# Supplementary material for: Comparative characterization of flavivirus production in two cell lines: Human hepatoma-derived Huh7.5.1-8 and African green monkey kidney-derived Vero
Source: PubMed Central journal article supplement (PMC7182267; doi:10.1371/journal.pone.0232274), 2020-04-24
Supplement: pone.0232274.s010.pdf [file pone.0232274.s010.pdf]

S10 Fig. Nucleotide sequences of RIG-I full-length cDNAs (FL1,2) and splice variants (SV1, 2).

|            |     |                                                                 |                            |     |
|------------|-----|-----------------------------------------------------------------|----------------------------|-----|
| AF038963.1 | 1   | TAGTTATTAAAGTTCCTATGCAGCTCCGCCTCC                               | GTCCGGCCTCATTTCCTCGAAAATCC | 60  |
| FL1        | 1   | -----                                                           | GTCCGGCCTCATTTCCTCGAAAATCC | 27  |
| FL2        | 1   | -----                                                           | GTCCGGCCTCATTTCCTCGAAAATCC | 27  |
| SV1        | 1   | -----                                                           | GTCCGGCCTCATTTCCTCGAAAATCC | 27  |
| SV2        | 1   | -----                                                           | GTCCGGCCTCATTTCCTCGAAAATCC | 27  |
| AF038963.1 | 61  | CTGCTTTCCCGCTCGCCACGCCCTCCTGCTACCCGGCTTTAAAGCTAGTGAGGCACAGC     |                            | 120 |
| FL1        | 28  | CTGCTTTCCCGCTCGCCACGCCCTCCTGCTACCCGGCTTTAAAGCTAGTGAGGCACAGC     |                            | 87  |
| FL2        | 28  | CTGCTTTCCCGCTCGCCACGCCCTCCTGCTACCCGGCTTTAAAGCTAGTGAGGCACAGC     |                            | 87  |
| SV1        | 28  | CTGCTTTCCCGCTCGCCACGCCCTCCTGCTACCCGGCTTTAAAGCTAGTGAGGCACAGC     |                            | 87  |
| SV2        | 28  | CTGCTTTCCCGCTCGCCACGCCCTCCTGCTACCCGGCTTTAAAGCTAGTGAGGCACAGC     |                            | 87  |
| AF038963.1 | 121 | CTGCGGGGAACGTAGCTAGCTGCAAGCAGAGGCCGGCATGACCACCGAGCAGCGACGCAG    |                            | 180 |
| FL1        | 88  | CTGCGGGGAACGTAGCTAGCTGCAAGCAGAGGCCGGCATGACCACCGAGCAGCGACGCAG    |                            | 147 |
| FL2        | 88  | CTGCGGGGAACGTAGCTAGCTGCAAGCAGAGGCCGGCATGACCACCGAGCAGCGACGCAG    |                            | 147 |
| SV1        | 88  | CTGCGGGGAACGTAGCTAGCTGCAAGCAGAGGCCGGCATGACCACCGAGCAGCGACGCAG    |                            | 147 |
| SV2        | 88  | CTGCGGGGAACGTAGCTAGCTGCAAGCAGAGGCCGGCATGACCACCGAGCAGCGACGCAG    |                            | 147 |
| AF038963.1 | 181 | CCTGCAAGCCTTCCAGGATTATATCCGGAAGACCCTGGACCCTACCTACATCCTGAGCTA    |                            | 240 |
| FL1        | 148 | CCTGCAAGCCTTCCAGGATTATATCCGGAAGACCCTGGACCCTACCTACATCCTGAGCTA    |                            | 207 |
| FL2        | 148 | CCTGCAAGCCTTCCAGGATTATATCCGGAAGACCCTGGACCCTACCTACATCCTGAGCTA    |                            | 207 |
| SV1        | 148 | CCTGCAAGCCTTCCAGGATTATATCCGGAAGACCCTGGACCCTACCTACATCCTGAGCTA    |                            | 207 |
| SV2        | 148 | CCTGCAAGCCTTCCAGGATTATATCCGGAAGACCCTGGACCCTACCTACATCCTGAGCTA    |                            | 207 |
| AF038963.1 | 241 | CATGGCCCCCTGGTTTtagggaggaagaggtgcagtatattcaggctgagaaaaacaacaa   |                            | 300 |
| FL1        | 208 | CATGGCCCCCTGGTTTtagggaggaagaggtgcagtatattcaggctgagaaaaacaacaa   |                            | 267 |
| FL2        | 208 | CATGGCCCCCTGGTTTtagggaggaagaggtgcagtatattcaggctgagaaaaacaacaa   |                            | 267 |
| SV1        | 208 | CATGGCCCCCTGGTTTtagggaggaagaggtgcagtatattcaggctgagaaaaacaacaa   |                            | 267 |
| SV2        | 208 | CATGGCCCCCTGGTTTtagggaggaagaggtgcagtatattcaggctgagaaaaacaacaa   |                            | 267 |
| AF038963.1 | 301 | GGGCCCAATGGAGGCTGCCACACTTTTTCTCAAGTTCCTGTTGGAGCTCCAGGAGGAAGG    |                            | 360 |
| FL1        | 268 | GGGCCCAATGGAGGCTGCCACACTTTTTCTCAAGTTCCTGTTGGAGCTCCAGGAGGAAGG    |                            | 327 |
| FL2        | 268 | GGGCCCAATGGAGGCTGCCACTTTACTTTTTCTCAAGTTCCTGTTGGAGCTCCAGGAGGAAGG |                            | 327 |
| SV1        | 268 | GGGCCCAATGGAGGCTGCCACACTTTTTCTCAAGTTCCTGTTGGAGCTCCAGGAGGAAGG    |                            | 327 |
| SV2        | 268 | GGGCCCAATGGAGGCTGCCACACTTTTTCTCAAGTTCCTGTTGGAGCTCCAGGAGGAAGG    |                            | 327 |
| AF038963.1 | 361 | CTGGTCCCGTGGCTTTTTGGATGCCCTAGACCATGCAGGTTATTCTGGACTTTATGAAGC    |                            | 420 |
| FL1        | 328 | CTGGTCCCGTGGCTTTTTGGATGCCCTAGACCATGCAGGTTATTCTGGACTTTATGAAGC    |                            | 387 |
| FL2        | 328 | CTGGTCCCGTGGCTTTTTGGATGCCCTAGACCATGCAGGTTATTCTGGACTTTATGAAGC    |                            | 387 |
| SV1        | 328 | CTGGTCCCGTGGCTTTTTGGATGCCCTAGACCATGCAGGTTATTCTGGACTTTATGAAGC    |                            | 387 |
| SV2        | 328 | CTGGTCCCGTGGCTTTTTGGATGCCCTAGACCATGCAGGTTATTCTGGACTTTATGAAGC    |                            | 387 |
| AF038963.1 | 421 | CATTGAAAGTTGGGATTTCAAAAAAATTGAAAAGTTGGAGGAGTATAGATTACTTTTAAA    |                            | 480 |
| FL1        | 388 | CATTGAAAGTTGGGATTTCAAAAAAATTGAAAAGTTGGAGGAGTATAGATTACTTTTAAA    |                            | 447 |
| FL2        | 388 | CATTGAAAGTTGGGATTTCAAAAAAATTGAAAAGTTGGAGGAGTATAGATTACTTTTAAA    |                            | 447 |
| SV1        | 388 | CATTGAAAGTTGGGATTTCAAAAAAATTGAAAAGTTGGAGGAGTATAGATTACTTTTAAA    |                            | 447 |
| SV2        | 388 | CATTGAAAGTTGGGATTTCAAAAAAATTGAAAAGTTGGAGGAGTATAGATTACTTTTAAA    |                            | 447 |
| AF038963.1 | 481 | ACGTTTACAACCAGAATTTAAAACCAGAATTATCCCAACCGATATCATTCTGATCTGTC     |                            | 540 |
| FL1        | 448 | ACGTTTACAACCAGAATTTAAAACCAGAATTATCCCAACCGATATCATTCTGATCTGTC     |                            | 507 |
| FL2        | 448 | ACGTTTACAACCAGAATTTAAAACCAGAATTATCCCAACCGATATCATTCTGATCTGTC     |                            | 507 |
| SV1        | 448 | ACGTTTACAACCAGAATTTAAAACCAGAATTATCCCAACCGATATCATTCTGATCTGTC     |                            | 507 |
| SV2        | 448 | ACGTTTACAACCAGAATTTAAAACCAGAATTATCCCAACCGATATCATTCTGATCTGTC     |                            | 507 |
| AF038963.1 | 541 | TGAATGTTTAATTAATCAGGAATGTGAAGAAATTCTACAGATTTGCTCTACTAAGGGGAT    |                            | 600 |
| FL1        | 508 | TGAATGTTTAATTAATCAGGAATGTGAAGAAATTCTACAGATTTGCTCTACTAAGGGGAT    |                            | 567 |
| FL2        | 508 | TGAATGTTTAATTAATCAGGAATGTGAAGAAATTCTACAGATTTGCTCTACTAAGGGGAT    |                            | 567 |
| SV1        | 508 | TGAATGTTTAATTAATCAGGAATGTGAAGAAATTCTACAGATTTGCTCTACTAAGGGGAT    |                            | 567 |
| SV2        | 508 | TGAATGTTTAATTAATCAGGAATGTGAAGAAATTCTACAGATTTGCTCTACTAAGGGGAT    |                            | 567 |
| AF038963.1 | 601 | GATGGCAGGTGCAGAGAAATGGTGGAATGCCTTCTCAGATCAGACAAGGAAAACCTGGCC    |                            | 660 |
| FL1        | 568 | GATGGCAGGTGCAGAGAAATGGTGGAATGCCTTCTCAGATCAGACAAGGAAAACCTGGCC    |                            | 627 |
| FL2        | 568 | GATGGCAGGTGCAGAGAAATGGTGGAATGCCTTCTCAGATCAGACAAGGAAAACCTGGCC    |                            | 627 |
| SV1        | 568 | GATGGCAGGTGCAGAGAAATGGTGGAATGCCTTCTCAGATCAGACAAGGAAAACCTGGCC    |                            | 627 |
| SV2        | 568 | GATGGCAGGTGCAGAGAAATGGTGGAATGCCTTCTCAGATCAGACAAGGAAAACCTGGCC    |                            | 627 |

|            |      |                                                               |      |
|------------|------|---------------------------------------------------------------|------|
| AF038963.1 | 661  | CAAAACTTTGAAACTTGCTTTGGAGAAAAGGAACAAGTTCAGTGAACGTGGATTGT      | 720  |
| FL1        | 628  | CAAAACTTTGAAACTTGCTTTGGAGAAAAGGAACAAGTTCAGTGAACGTGGATTGT      | 687  |
| FL2        | 628  | CAAAACTTTGAAACTTGCTTTGGAGAAAAGGAACAAGTTCAGTGAACGTGGATTGT      | 687  |
| SV1        | 628  | CAAAACTTTGAAACTTGCTTTGGAGAAAAGGAACAAGTTCAGTGAACGTGGATTGT      | 687  |
| SV2        | 628  | CAAAACTTTGAAACTTGCTTTGGAGAAAAGGAACAAGTTCAGTGAACGTGGATTGT      | 687  |
| AF038963.1 | 721  | AGAGAAAGGTATAAAAAGATGTTGAAACAGAAGATCTTGAGGATAAGATGGAAACTTCTGA | 780  |
| FL1        | 688  | AGAGAAAGGTATAAAAAGATGTTGAAACAGAAGATCTTGAGGATAAGATGGAAACTTCTGA | 747  |
| FL2        | 688  | AGAGAAAGGTATAAAAAGATGTTGAAACAGAAGATCTTGAGGATAAGATGGAAACTTCTGA | 747  |
| SV1        | 688  | AGAGAAAGGTATAAAAAGATGTTGAAACAGAAGATCTTGAGGATAAGATGGAAACTTCTGA | 747  |
| SV2        | 688  | AGAGA-----                                                    | 692  |
| AF038963.1 | 781  | CATACAGATTTTCTACCAAGAAGATCCAGAATGCCAGAATCTTAGTGAGAATTCATGTCC  | 840  |
| FL1        | 748  | CATACAGATTTTCTACCAAGAAGATCCAGAATGCCAGAATCTTAGTGAGAATTCATGTCC  | 807  |
| FL2        | 748  | CATACAGATTTTCTACCAAGAAGATCCAGAATGCCAGAATCTTAGTGAGAATTCATGTCC  | 807  |
| SV1        | 748  | CATACAGATTTTCTACCAAGAAGATCCAGAATGCCAGAATCTTAGTGAGAATTCATGTCC  | 807  |
| SV2        | 692  | -----                                                         | 692  |
| AF038963.1 | 841  | ACCTTCAGAAGTGTCTGATACAAACTTGTACAGCCATTTAAACCAAGAAATACCAATT    | 900  |
| FL1        | 808  | ACCTTCAGAAGTGTCTGATACAAACTTGTACAGCCATTTAAACCAAGAAATACCAATT    | 867  |
| FL2        | 808  | ACCTTCAGAAGTGTCTGATACAAACTTGTACAGCCATTTAAACCAAGAAATACCAATT    | 867  |
| SV1        | 808  | ACCTTC-----                                                   | 813  |
| SV2        | 692  | -----                                                         | 692  |
| AF038963.1 | 901  | AGAGCTTGCTTTGCCTGCTATGAAAGGAAAAAACACAATAATATGTGCTCCTACAGGTTG  | 960  |
| FL1        | 868  | AGAGCTTGCTTTGCCTGCTATGAAAGGAAAAAACACAATAATATGTGCTCCTACAGGTTG  | 927  |
| FL2        | 868  | AGAGCTTGCTTTGCCTGCTATGAAAGGAAAAAACACAATAATATGTGCTCCTACAGGTTG  | 927  |
| SV1        | 813  | -----                                                         | 813  |
| SV2        | 692  | -----                                                         | 692  |
| AF038963.1 | 961  | TGGAAAAACCTTTGTTTCACTGCTTATATGTGAACATCATCTTAAAAAATTCACACAAGG  | 1020 |
| FL1        | 928  | TGGAAAAACCTTTGTTTCACTGCTTATATGTGAACATCATCTTAAAAAATTCACACAAGG  | 987  |
| FL2        | 928  | TGGAAAAACCTTTGTTTCACTGCTTATATGTGAACATCATCTTAAAAAATTCACACAAGG  | 987  |
| SV1        | 813  | -----                                                         | 813  |
| SV2        | 692  | -----                                                         | 692  |
| AF038963.1 | 1021 | ACAAAAGGGGAAAGTTGTCTTTTTTTCGGAATCAGATCCCAGTGTATGAACAGCAGAAATC | 1080 |
| FL1        | 988  | ACAAAAGGGGAAAGTTGTCTTTTTTTCGGAATCAGATCCCAGTGTATGAACAGCAGAAATC | 1047 |
| FL2        | 988  | ACAAAAGGGGAAAGTTGTCTTTTTTTCGGAATCAGATCCCAGTGTATGAACAGCAGAAATC | 1047 |
| SV1        | 813  | -----                                                         | 813  |
| SV2        | 692  | -----                                                         | 692  |
| AF038963.1 | 1081 | TGTATTCTCAAATACTTTGAAAGACATGGGTATAGAGTTACAGGCATTTCTGGAGCAAC   | 1140 |
| FL1        | 1048 | TGTATTCTCAAATACTTTGAAAGACATGGGTATAGAGTTACAGGCATTTCTGGAGCAAC   | 1107 |
| FL2        | 1048 | TGTATTCTCAAATACTTTGAAAGACATGGGTATAGAGTTACAGGCATTTCTGGAGCAAC   | 1107 |
| SV1        | 813  | -----                                                         | 813  |
| SV2        | 692  | -----                                                         | 692  |
| AF038963.1 | 1141 | AGCTGAGAATGTCCAGTGGAACAGATTGTTGAGAACAATGACATCATCATTTTAACTCC   | 1200 |
| FL1        | 1108 | AGCTGAGAATGTCCAGTGGAACAGATTGTTGAGAACAATGACATCATCATTTTAACTCC   | 1167 |
| FL2        | 1108 | AGCTGAGAATGTCCAGTGGAACAGATTGTTGAGAACAATGACATCATCATTTTAACTCC   | 1167 |
| SV1        | 813  | -----                                                         | 813  |
| SV2        | 692  | -----                                                         | 692  |
| AF038963.1 | 1201 | ACAGATTCTTGTGAACAACCTTAAAAAGGGAACGATTCCATCACTATCCATCTTTACTTT  | 1260 |
| FL1        | 1168 | ACAGATTCTTGTGAACAACCTTAAAAAGGGAACGATTCCATCACTATCCATCTTTACTTT  | 1227 |
| FL2        | 1168 | ACAGATTCTTGTGAACAACCTTAAAAAGGGAACGATTCCATCACTATCCATCTTTACTTT  | 1227 |
| SV1        | 813  | -----                                                         | 813  |
| SV2        | 692  | -----                                                         | 692  |
| AF038963.1 | 1261 | GATGATATTTGATGAATGCCACAACACTAGTAAACAACACCCGTACAATATGATCATGTT  | 1320 |
| FL1        | 1228 | GATGATATTTGATGAATGCCACAACACTAGTAAACAACACCCGTACAATATGATCATGTT  | 1287 |
| FL2        | 1228 | GATGATATTTGATGAATGCCACAACACTAGTAAACAACACCCGTACAATATGATCATGTT  | 1287 |
| SV1        | 813  | -----                                                         | 813  |
| SV2        | 692  | -----                                                         | 692  |

|            |      |                                                               |                          |      |
|------------|------|---------------------------------------------------------------|--------------------------|------|
| AF038963.1 | 1321 | TAATTATCTAGATCAGAAACTTGGAGGATCTTCAGGCCCACTGCCCCAGGTCATTGGGGCT | 1380                     |      |
| FL1        | 1288 | TAATTATCTAGATCAGAAACTTGGAGGATCTTCAGGCCCACTGCCCCAGGTCATTGGGGCT | 1347                     |      |
| FL2        | 1288 | TAATTATCTAGATCAGAAACTTGGAGGATCTTCAGGCCCACTGCCCCAGGTCATTGGGGCT | 1347                     |      |
| SV1        | 813  | -----                                                         | 813                      |      |
| SV2        | 692  | -----                                                         | 692                      |      |
| AF038963.1 | 1381 | GACTGCCTCGGTTGGTGTGGGGATGCCAAAAACACAGATGAAGCCTTGGATTATATCTG   | 1440                     |      |
| FL1        | 1348 | GACTGCCTCGGTTGGTGTGGGGATGCCAAAAACACAGATGAAGCCTTGGATTATATCTG   | 1407                     |      |
| FL2        | 1348 | GACTGCCTCGGTTGGTGTGGGGATGCCAAAAACACAGATGAAGCCTTGGATTATATCTG   | 1407                     |      |
| SV1        | 813  | -----                                                         | 813                      |      |
| SV2        | 692  | -----                                                         | 692                      |      |
| AF038963.1 | 1441 | CAAGCTGTGTGCTTCTCTTGATGCGTCAGTGATAGCAACAGTCAAACACAATCTGGAGGA  | 1500                     |      |
| FL1        | 1408 | CAAGCTGTGTGCTTCTCTTGATGCGTCAGTGATAGCAACAGTCAAACACAATCTGGAGGA  | 1467                     |      |
| FL2        | 1408 | CAAGCTGTGTGCTTCTCTTGATGCGTCAGTGATAGCAACAGTCAAACACAATCTGGAGGA  | 1467                     |      |
| SV1        | 813  | -----                                                         | 813                      |      |
| SV2        | 692  | -----                                                         | 692                      |      |
| AF038963.1 | 1501 | ACTGGAGCAAGTTGTTTATAAGCCCCAGAAGTTTTTCAGGAAAGTGAATCACGGATTAG   | 1560                     |      |
| FL1        | 1468 | ACTGGAGCAAGTTGTTTATAAGCCCCAGAAGTTTTTCAGGAAAGTGAATCACGGATTAG   | 1527                     |      |
| FL2        | 1468 | ACTGGAGCAAGTTGTTTATAAGCCCCAGAAGTTTTTCAGGAAAGTGAATCACGGATTAG   | 1527                     |      |
| SV1        | 813  | -----                                                         | 813                      |      |
| SV2        | 692  | -----                                                         | 692                      |      |
| AF038963.1 | 1561 | CGACAAATTTAAATACATCATAGCTCAGCTGATGAGGGACACAGAGAGTCTGGCAAAGAG  | 1620                     |      |
| FL1        | 1528 | CGACAAATTTAAATACATCATAGCTCAGCTGATGAGGGACACAGAGAGTCTGGCAAAGAG  | 1587                     |      |
| FL2        | 1528 | CGACAAATTTAAATACATCATAGCTCAGCTGATGAGGGACACAGAGAGTCTGGCAAAGAG  | 1587                     |      |
| SV1        | 813  | -----                                                         | 813                      |      |
| SV2        | 692  | -----                                                         | 692                      |      |
| AF038963.1 | 1621 | AATCTGCAAAGACCTCGAAAACCTTATCTCAAATTCAAAATAGGGAATTTGGAACACAGAA | 1680                     |      |
| FL1        | 1588 | AATCTGCAAAGACCTCGAAAACCTTATCTCAAATTCAAAATAGGGAATTTGGAACACAGAA | 1647                     |      |
| FL2        | 1588 | AATCTGCAAAGACCTCGAAAACCTTATCTCAAATTCAAAATAGGGAATTTGGAACACAGAA | 1647                     |      |
| SV1        | 813  | -----                                                         | 813                      |      |
| SV2        | 692  | -----                                                         | 692                      |      |
| AF038963.1 | 1681 | ATATGAACAATGGATTGTTACAGTTCAGAAAGCATGCATGGTGTTCAGATGCCAGACAA   | 1740                     |      |
| FL1        | 1648 | ATATGAACAATGGATTGTTACAGTTCAGAAAGCATGCATGGTGTTCAGATGCCAGACAA   | 1707                     |      |
| FL2        | 1648 | ATATGAACAATGGATTGTTACAGTTCAGAAAGCATGCATGGTGTTCAGATGCCAGACAA   | 1707                     |      |
| SV1        | 813  | -----                                                         | 813                      |      |
| SV2        | 692  | -----                                                         | 692                      |      |
| AF038963.1 | 1741 | AGATGAAGAGAGCAGGATTTGTAAAGCCCTGTTTTTATACTTCACATTTGCGGAAATA    | 1800                     |      |
| FL1        | 1708 | AGATGAAGAGAGCAGGATTTGTAAAGCCCTGTTTTTATACTTCACATTTGCGGAAATA    | 1767                     |      |
| FL2        | 1708 | AGATGAAGAGAGCAGGATTTGTAAAGCCCTGTTTTTATACTTCACATTTGCGGAAATA    | 1767                     |      |
| SV1        | 813  | -----                                                         | 813                      |      |
| SV2        | 692  | -----                                                         | 692                      |      |
| AF038963.1 | 1801 | TAATGATGCCCTCATTATCAGTGAGCATGCACGAATGAAAGATGCTCTGGATTACTTGAA  | 1860                     |      |
| FL1        | 1768 | TAATGATGCCCTCATTATCAGTGAGCATGCACGAATGAAAGATGCTCTGGATTACTTGAA  | 1827                     |      |
| FL2        | 1768 | TAATGATGCCCTCATTATCAGTGAGCATGCACGAATGAAAGATGCTCTGGATTACTTGAA  | 1827                     |      |
| SV1        | 813  | -----                                                         | 813                      |      |
| SV2        | 692  | -----                                                         | 692                      |      |
| AF038963.1 | 1861 | AGACTTCTTCAGCAATGTCCGAGCAGCAGGATTCGAA                         | GAGATTGAGCAAGATCCTTACTCA | 1920 |
| FL1        | 1828 | AGACTTCTTCAGCAATGTCCGAGCAGCAGGATTCGAA                         | GAGATTGAGCAAGATCCTTACTCA | 1887 |
| FL2        | 1828 | AGACTTCTTCAGCAATGTCCGAGCAGCAGGATTCGAA                         | GAGATTGAGCAAGATCCTTACTCA | 1887 |
| SV1        | 813  | -----                                                         | -----                    | 813  |
| SV2        | 692  | -----                                                         | -----                    | 692  |
| AF038963.1 | 1921 | GAGATTTGAAGAAAAGCTGCAGGAACTAGAAAAGTGTTCAGGGATCCCAGCAATGAGAA   | 1980                     |      |
| FL1        | 1888 | GAGATTTGAAGAAAAGCTGCAGGAACTAGAAAAGTGTTCAGGGATCCCAGCAATGAGAA   | 1947                     |      |
| FL2        | 1888 | GAGATTTGAAGAAAAGCTGCAGGAACTAGAAAAGTGTTCAGGGATCCCAGCAATGAGAA   | 1947                     |      |
| SV1        | 814  | -----AGAAAAGCTGCAGGAACTAGAAAAGTGTTCAGGGATCCCAGCAATGAGAA       | 864                      |      |
| SV2        | 693  | -----AAGAAAAGCTGCAGGAACTAGAAAAGTGTTCAGGGATCCCAGCAATGAGAA      | 744                      |      |

|            |      |                                                               |      |
|------------|------|---------------------------------------------------------------|------|
| AF038963.1 | 1981 | TCCTAAACTTGAAGACCTCTGCTTCATCTTACAAGAAGAGTACCACCTTAAACCCAGAGAC | 2040 |
| FL1        | 1948 | TCCTAAACTTGAAGACCTCTGCTTCATCTTACAAGAAGAGTACCACCTTAAACCCAGAGAC | 2007 |
| FL2        | 1948 | TCCTAAACTTGAAGACCTCTGCTTCATCTTACAAGAAGAGTACCACCTTAAACCCAGAGAC | 2007 |
| SV1        | 865  | TCCTAAACTTGAAGACCTCTGCTTCATCTTACAAGAAGAGTACCACCTTAAACCCAGAGAC | 924  |
| SV2        | 745  | TCCTAAACTTGAAGACCTCTGCTTCATCTTACAAGAAGAGTACCACCTTAAACCCAGAGAC | 804  |
| AF038963.1 | 2041 | AATAACAATTCTCTTTGTGAAAACCAGAGCACCTTGTGGACGCTTTAAAAAATTGGATTGA | 2100 |
| FL1        | 2008 | AATAACAATTCTCTTTGTGAAAACCAGAGCACCTTGTGGACGCTTTAAAAAATTGGATTGA | 2067 |
| FL2        | 2008 | AATAACAATTCTCTTTGTGAAAACCAGAGCACCTTGTGGACGCTTTAAAAAATTGGATTGA | 2067 |
| SV1        | 925  | AATAACAATTCTCTTTGTGAAAACCAGAGCACCTTGTGGACGCTTTAAAAAATTGGATTGA | 984  |
| SV2        | 805  | AATAACAATTCTCTTTGTGAAAACCAGAGCACCTTGTGGACGCTTTAAAAAATTGGATTGA | 864  |
| AF038963.1 | 2101 | AGGAAATCCTAAACTCAGTTTTTCTAAAACCTGGCATATTGACTGGACGTGGCAAACAAA  | 2160 |
| FL1        | 2068 | AGGAAATCCTAAACTCAGTTTTTCTAAAACCTGGCATATTGACTGGACGTGGCAAACAAA  | 2127 |
| FL2        | 2068 | AGGAAATCCTAAACTCAGTTTTTCTAAAACCTGGCATATTGACTGGACGTGGCAAACAAA  | 2127 |
| SV1        | 985  | AGGAAATCCTAAACTCAGTTTTTCTAAAACCTGGCATATTGACTGGACGTGGCAAACAAA  | 1044 |
| SV2        | 865  | AGGAAATCCTAAACTCAGTTTTTCTAAAACCTGGCATATTGACTGGACGTGGCAAACAAA  | 924  |
| AF038963.1 | 2161 | TCAGAACACAGGAATGACCCTCCCGGCACAGAAGTGTATATTGGATGCATTCAAAGCCAG  | 2220 |
| FL1        | 2128 | TCAGAACACAGGAATGACCCTCCCGGCACAGAAGTGTATATTGGATGCATTCAAAGCCAG  | 2187 |
| FL2        | 2128 | TCAGAACACAGGAATGACCCTCCCGGCACAGAAGTGTATATTGGATGCATTCAAAGCCAG  | 2187 |
| SV1        | 1045 | TCAGAACACAGGAATGACCCTCCCGGCACAGAAGTGTATATTGGATGCATTCAAAGCCAG  | 1104 |
| SV2        | 925  | TCAGAACACAGGAATGACCCTCCCGGCACAGAAGTGTATATTGGATGCATTCAAAGCCAG  | 984  |
| AF038963.1 | 2221 | TGGAGATCACAATATTCTGATTGCCACCTCAGTTGCTGATGAAGGCATTGACATTGCACA  | 2280 |
| FL1        | 2188 | TGGAGATCACAATATTCTGATTGCCACCTCAGTTGCTGATGAAGGCATTGACATTGCACA  | 2247 |
| FL2        | 2188 | TGGAGATCACAATATTCTGATTGCCACCTCAGTTGCTGATGAAGGCATTGACATTGCACA  | 2247 |
| SV1        | 1105 | TGGAGATCACAATATTCTGATTGCCACCTCAGTTGCTGATGAAGGCATTGACATTGCACA  | 1164 |
| SV2        | 985  | TGGAGATCACAATATTCTGATTGCCACCTCAGTTGCTGATGAAGGCATTGACATTGCACA  | 1044 |
| AF038963.1 | 2281 | GTGCAATCTTGTTCATCCTTTATGAGTATGTGGGCAATGTCATCAAATGATCCAAACCAG  | 2340 |
| FL1        | 2248 | GTGCAATCTTGTTCATCCTTTATGAGTATGTGGGCAATGTCATCAAATGATCCAAACCAG  | 2307 |
| FL2        | 2248 | GTGCAATCTTGTTCATCCTTTATGAGTATGTGGGCAATGTCATCAAATGATCCAAACCAG  | 2307 |
| SV1        | 1165 | GTGCAATCTTGTTCATCCTTTATGAGTATGTGGGCAATGTCATCAAATGATCCAAACCAG  | 1224 |
| SV2        | 1045 | GTGCAATCTTGTTCATCCTTTATGAGTATGTGGGCAATGTCATCAAATGATCCAAACCAG  | 1104 |
| AF038963.1 | 2341 | AGGCAGAGGAAGAGCAAGAGGTAGCAAGTGCTTCCTTCTGACTAGTAATGCTGGTGTAAAT | 2400 |
| FL1        | 2308 | AGGCAGAGGAAGAGCAAGAGGTAGCAAGTGCTTCCTTCTGACTAGTAATGCTGGTGTAAAT | 2367 |
| FL2        | 2308 | AGGCAGAGGAAGAGCAAGAGGTAGCAAGTGCTTCCTTCTGACTAGTAATGCTGGTGTAAAT | 2367 |
| SV1        | 1225 | AGGCAGAGGAAGAGCAAGAGGTAGCAAGTGCTTCCTTCTGACTAGTAATGCTGGTGTAAAT | 1284 |
| SV2        | 1105 | AGGCAGAGGAAGAGCAAGAGGTAGCAAGTGCTTCCTTCTGACTAGTAATGCTGGTGTAAAT | 1164 |
| AF038963.1 | 2401 | TGAAAAAGAACAAATAAACATGTACAAAGAAAAAATGATGAATGACTCTATTTTACGCCT  | 2460 |
| FL1        | 2368 | TGAAAAAGAACAAATAAACATGTACAAAGAAAAAATGATGAATGACTCTATTTTACGCCT  | 2427 |
| FL2        | 2368 | TGAAAAAGAACAAATAAACATGTACAAAGAAAAAATGATGAATGACTCTATTTTACGCCT  | 2427 |
| SV1        | 1285 | TGAAAAAGAACAAATAAACATGTACAAAGAAAAAATGATGAATGACTCTATTTTACGCCT  | 1344 |
| SV2        | 1165 | TGAAAAAGAACAAATAAACATGTACAAAGAAAAAATGATGAATGACTCTATTTTACGCCT  | 1224 |
| AF038963.1 | 2461 | TCAGACATGGGACGAAGCAGTATTTAGGGAAAAGATTCTGCATATACAGACTCATGAAAA  | 2520 |
| FL1        | 2428 | TCAGACATGGGACGAAGCAGTATTTAGGGAAAAGATTCTGCATATACAGACTCATGAAAA  | 2487 |
| FL2        | 2428 | TCAGACATGGGACGAAGCAGTATTTAGGGAAAAGATTCTGCATATACAGACTCATGAAAA  | 2487 |
| SV1        | 1345 | TCAGACATGGGACGAAGCAGTATTTAGGGAAAAGATTCTGCATATACAGACTCATGAAAA  | 1404 |
| SV2        | 1225 | TCAGACATGGGACGAAGCAGTATTTAGGGAAAAGATTCTGCATATACAGACTCATGAAAA  | 1284 |
| AF038963.1 | 2521 | ATTCATCAGAGATAGTCAAGAAAAACCAAACCTGTCCCTGATAAGGAAAAATAAAAACT   | 2580 |
| FL1        | 2488 | ATTCATCAGAGATAGTCAAGAAAAACCAAACCTGTCCCTGATAAGGAAAAATAAAAACT   | 2547 |
| FL2        | 2488 | ATTCATCAGAGATAGTCAAGAAAAACCAAACCTGTCCCTGATAAGGAAAAATAAAAACT   | 2547 |
| SV1        | 1405 | ATTCATCAGAGATAGTCAAGAAAAACCAAACCTGTCCCTGATAAGGAAAAATAAAAACT   | 1464 |
| SV2        | 1285 | ATTCATCAGAGATAGTCAAGAAAAACCAAACCTGTCCCTGATAAGGAAAAATAAAAACT   | 1344 |
| AF038963.1 | 2581 | GCTCTGCAGAAAGTGCAAAGCCTTGGCATGTTACACAGCTGACGTAAGAGTGATAGAGGA  | 2640 |
| FL1        | 2548 | GCTCTGCAGAAAGTGCAAAGCCTTGGCATGTTACACAGCTGACGTAAGAGTGATAGAGGA  | 2607 |
| FL2        | 2548 | GCTCTGCAGAAAGTGCAAAGCCTTGGCATGTTACACAGCTGACGTAAGAGTGATAGAGGA  | 2607 |
| SV1        | 1465 | GCTCTGCAGAAAGTGCAAAGCCTTGGCATGTTACACAGCTGACGTAAGAGTGATAGAGGA  | 1524 |
| SV2        | 1345 | GCTCTGCAGAAAGTGCAAAGCCTTGGCATGTTACACAGCTGACGTAAGAGTGATAGAGGA  | 1404 |

|            |      |                                                                |      |
|------------|------|----------------------------------------------------------------|------|
| AF038963.1 | 2641 | ATGCCATTACACTGTGCTTGGAGATGCTTTTAAGGAATGCTTTGTGAGTAGACCACATCC   | 2700 |
| FL1        | 2608 | ATGCCATTACACTGTGCTTGGAGATGCTTTTAAGGAATGCTTTGTGAGTAGACCACATCC   | 2667 |
| FL2        | 2608 | ATGCCATTACACTGTGCTTGGAGATGCTTTTAAGGAATGCTTTGTGAGTAGACCACATCC   | 2667 |
| SV1        | 1525 | ATGCCATTACACTGTGCTTGGAGATGCTTTTAAGGAATGCTTTGTGAGTAGACCACATCC   | 1584 |
| SV2        | 1405 | ATGCCATTACACTGTGCTTGGAGATGCTTTTAAGGAATGCTTTGTGAGTAGACCACATCC   | 1464 |
| AF038963.1 | 2701 | CAAGCCAAAGCAGTTTTCAAGTTTTGAAAAAAGAGCAAAGATATTCTGTGCCCGACAGAA   | 2760 |
| FL1        | 2668 | CAAGCCAAAGCAGTTTTCAAGTTTTGAAAAAAGAGCAAAGATATTCTGTGCCCGACAGAA   | 2727 |
| FL2        | 2668 | CAAGCCAAAGCAGTTTTCAAGTTTTGAAAAAAGAGCAAAGATATTCTGTGCCCGACAGAA   | 2727 |
| SV1        | 1585 | CAAGCCAAAGCAGTTTTCAAGTTTTGAAAAAAGAGCAAAGATATTCTGTGCCCGACAGAA   | 1644 |
| SV2        | 1465 | CAAGCCAAAGCAGTTTTCAAGTTTTGAAAAAAGAGCAAAGATATTCTGTGCCCGACAGAA   | 1524 |
| AF038963.1 | 2761 | CTGCAGCCATGACTGGGGAATCCATGTGAAGTACAAGACATTTGAGATTCCAGTTATAAA   | 2820 |
| FL1        | 2728 | CTGCAGCCATGACTGGGGAATCCATGTGAAGTACAAGACATTTGAGATTCCAGTTATAAA   | 2787 |
| FL2        | 2728 | CTGCAGCCATGACTGGGGAATCCATGTGAAGTACAAGACATTTGAGATTCCAGTTATAAA   | 2787 |
| SV1        | 1645 | CTGCAGCCATGACTGGGGAATCCATGTGAAGTACAAGACATTTGAGATTCCAGTTATAAA   | 1704 |
| SV2        | 1525 | CTGCAGCCATGACTGGGGAATCCATGTGAAGTACAAGACATTTGAGATTCCAGTTATAAA   | 1584 |
| AF038963.1 | 2821 | AATTGAAAGTTTTGTGGTGGAGGATATTGCAACTGGAGTTCAGACACTGTACTCGAAGTG   | 2880 |
| FL1        | 2788 | AATTGAAAGTTTTGTGGTGGAGGATATTGCAACTGGAGTTCAGACACTGTACTCGAAGTG   | 2847 |
| FL2        | 2788 | AATTGAAAGTTTTGTGGTGGAGGATATTGCAACTGGAGTTCAGACACTGTACTCGAAGTG   | 2847 |
| SV1        | 1705 | AATTGAAAGTTTTGTGGTGGAGGATATTGCAACTGGAGTTCAGACACTGTACTCGAAGTG   | 1764 |
| SV2        | 1585 | AATTGAAAGTTTTGTGGTGGAGGATATTGCAACTGGAGTTCAGACACTGTACTCGAAGTG   | 1644 |
| AF038963.1 | 2881 | GAAGGACTTTTCATTTTGAGAAGATAACCATTTGATCCAGCAGAAATGTCCAAATGATATCA | 2940 |
| FL1        | 2848 | GAAGGACTTTTCATTTTGAGAAGATAACCATTTGATCCAGCAGAAATGTCCAAATGATATCA | 2907 |
| FL2        | 2848 | GAAGGACTTTTCATTTTGAGAAGATAACCATTTGATCCAGCAGAAATGTCCAAATGATATCA | 2907 |
| SV1        | 1765 | GAAGGACTTTTCATTTTGAGAAGATAACCATTTGATCCAGCAGAAATGTCCAAATGATATCA | 1824 |
| SV2        | 1645 | GAAGGACTTTTCATTTTGAGAAGATAACCATTTGATCCAGCAGAAATGTCCAAATGATATCA | 1704 |
| AF038963.1 | 2941 | GGTCCTCAATCTTCAGCTACAGGGAATGAGTAACTTTGAGTGGAGAAGAAACAAACATAG   | 3000 |
| FL1        | 2908 | GGTCCTCAATCTTCAGCTACAGGGAATGAGTAACTTTGAGTGGAGAAGAAACAAACATAG   | 2967 |
| FL2        | 2908 | GGTCCTCAATCTTCAGCTACAGGGAATGAGTAACTTTGAGTGGAGAAGAAACAAACATAG   | 2967 |
| SV1        | 1825 | GGTCCTCAATCTTCAGCTACAGGGAATGAGTAACTTTGAGTGGAGAAGAAACAAACATAG   | 1884 |
| SV2        | 1705 | GGTCCTCAATCTTCAGCTACAGGGAATGAGTAACTTTGAGTGGAGAAGAAACAAACATAG   | 1764 |
| AF038963.1 | 3001 | TGGGTATAATCATGGATCGCTTGTACC                                    | 3060 |
| FL1        | 2968 | TGGGTATAATCATGGATCGCTTGTACC-----                               | 2994 |
| FL2        | 2968 | TGGGTATAATCATGGATCGCTTGTACC-----                               | 2994 |
| SV1        | 1885 | TGGGTATAATCATGGATCGCTTGTACC-----                               | 1911 |
| SV2        | 1765 | TGGGTATAATCATGGATCGCTTGTACC-----                               | 1791 |
| AF038963.1 | 3061 | AAAAA                                                          | 3065 |
| FL1        | 2994 | -----                                                          | 2994 |
| FL2        | 2994 | -----                                                          | 2994 |
| SV1        | 1911 | -----                                                          | 1911 |
| SV2        | 1791 | -----                                                          | 1791 |
