# Supplementary material for: Comparative characterization of flavivirus production in two cell lines: Human hepatoma-derived Huh7.5.1-8 and African green monkey kidney-derived Vero
Source: PubMed Central journal article supplement (PMC7182267; doi:10.1371/journal.pone.0232274), 2020-04-24

# Fig 1C\_unadjusted\_images

**C.**

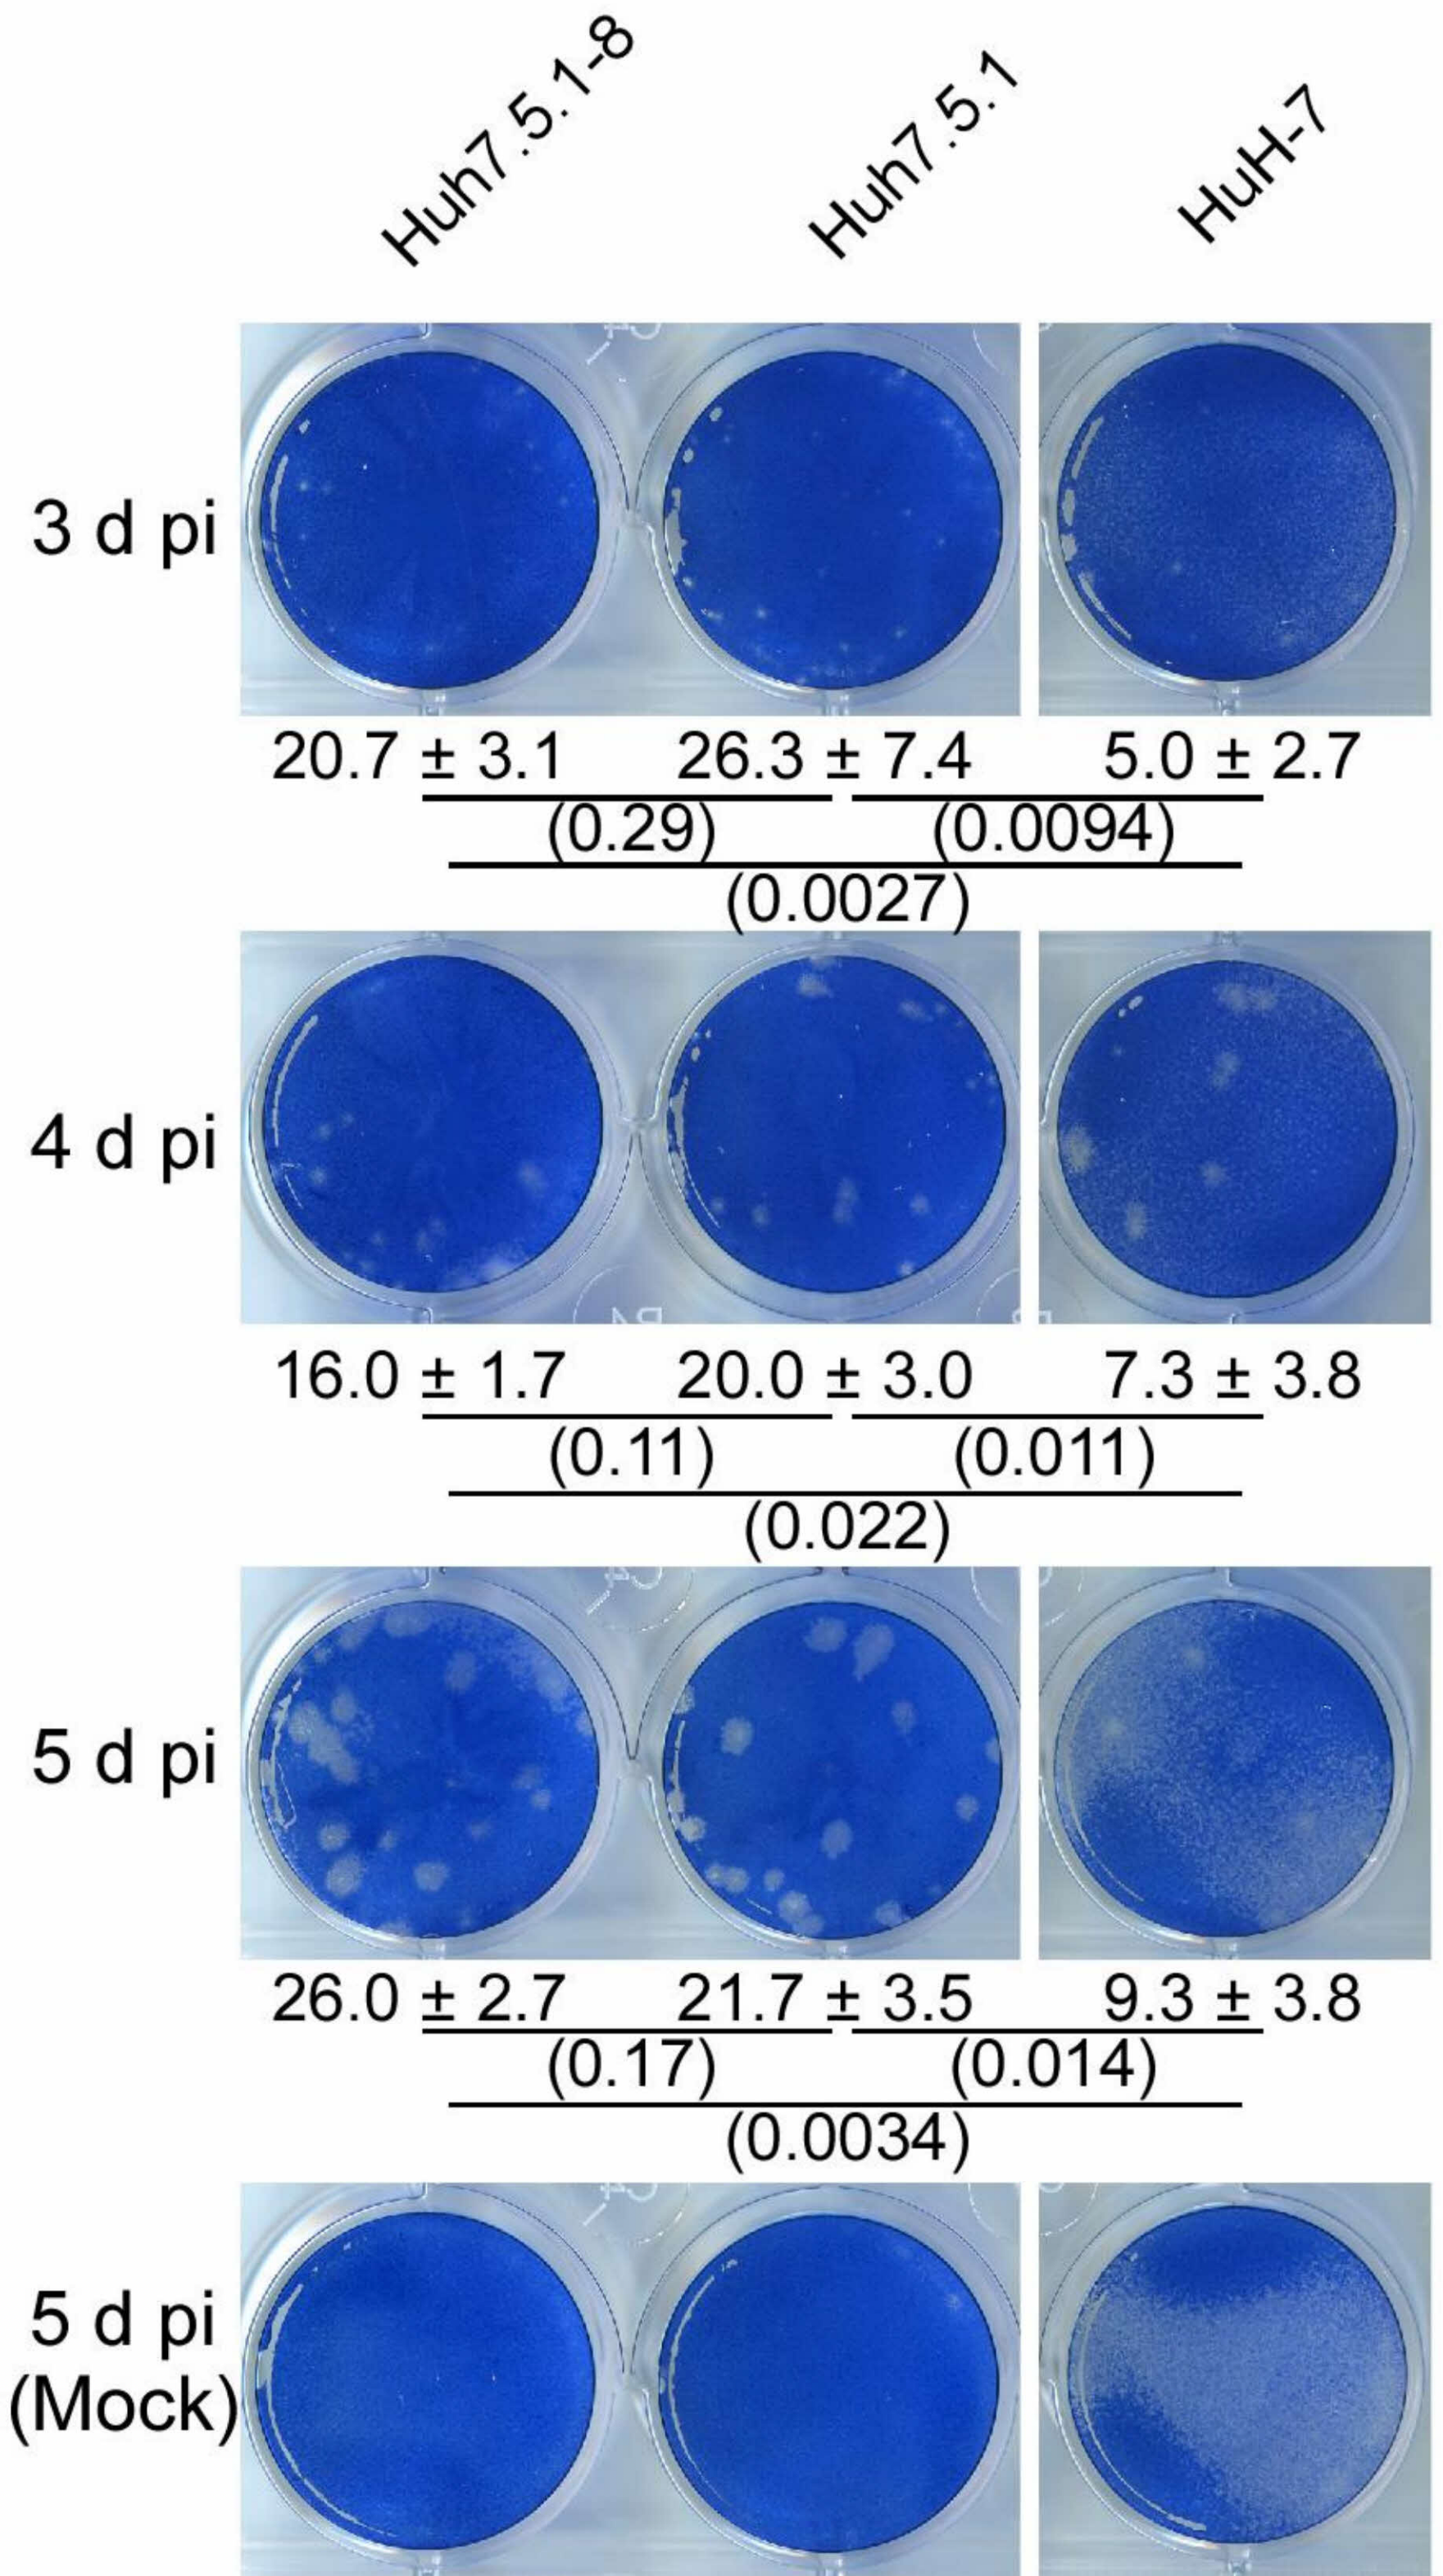

Fig 7\_unadjusted\_images

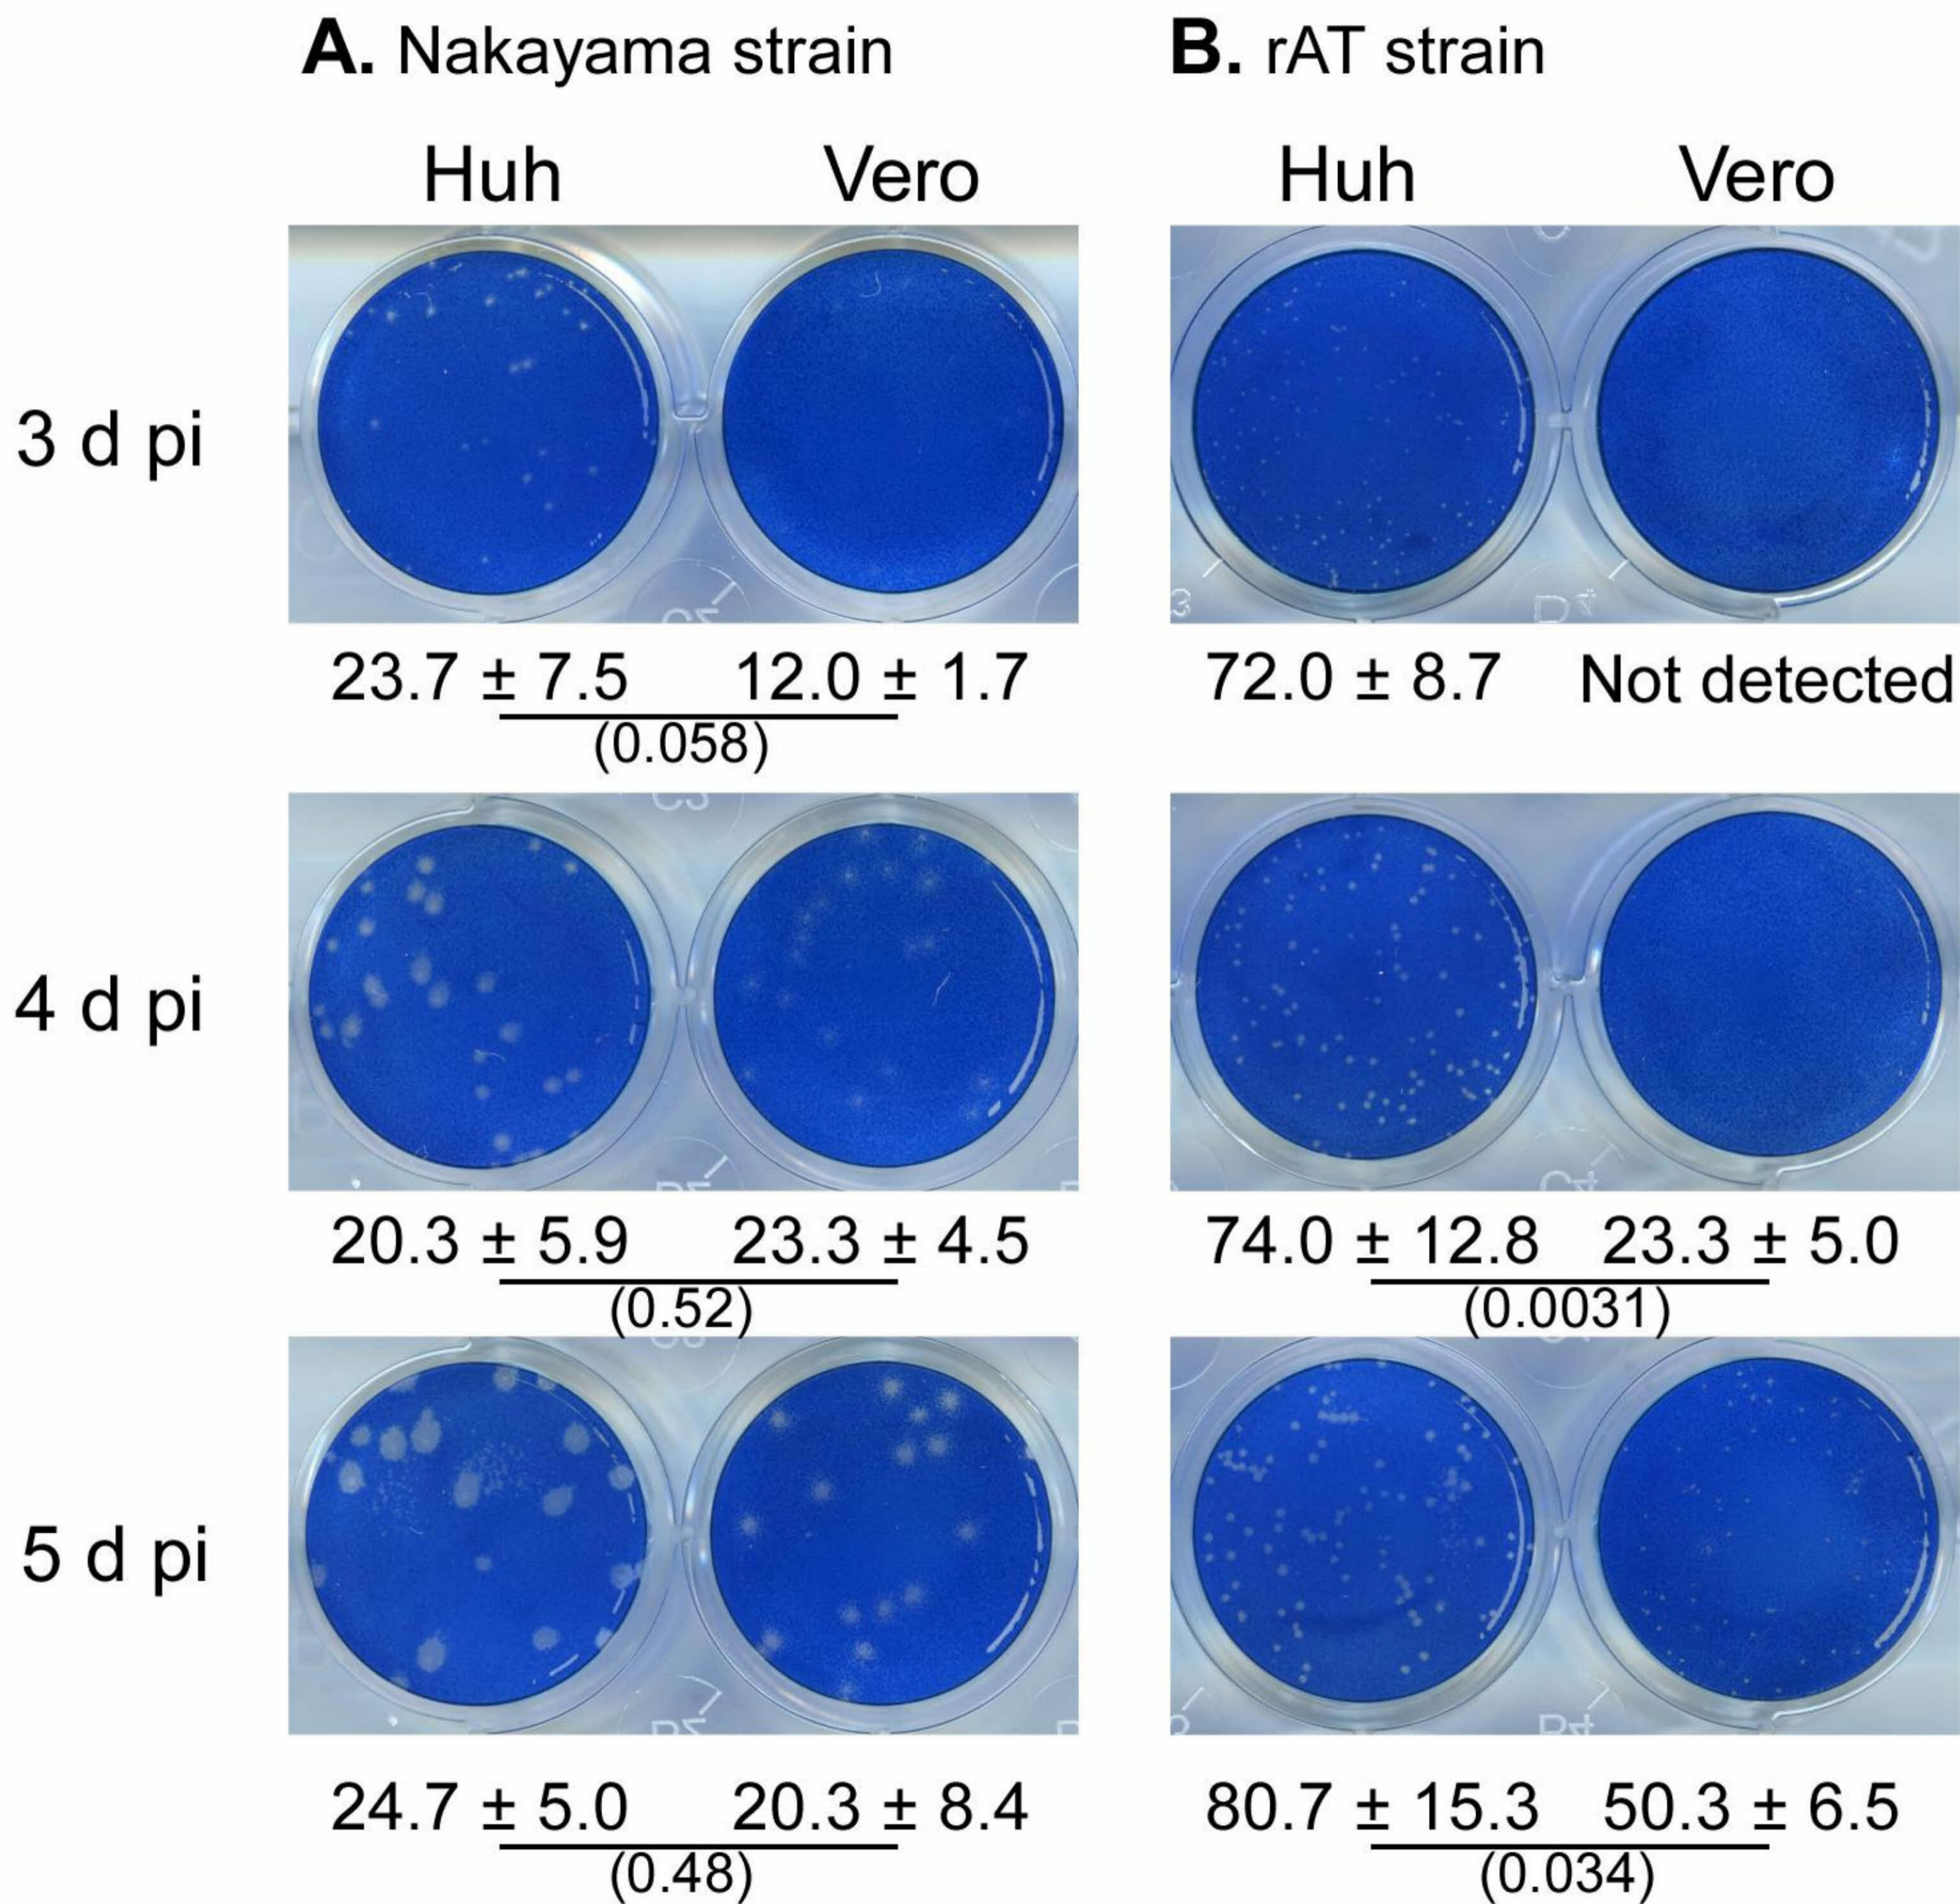

Fig 9\_unadjusted\_images

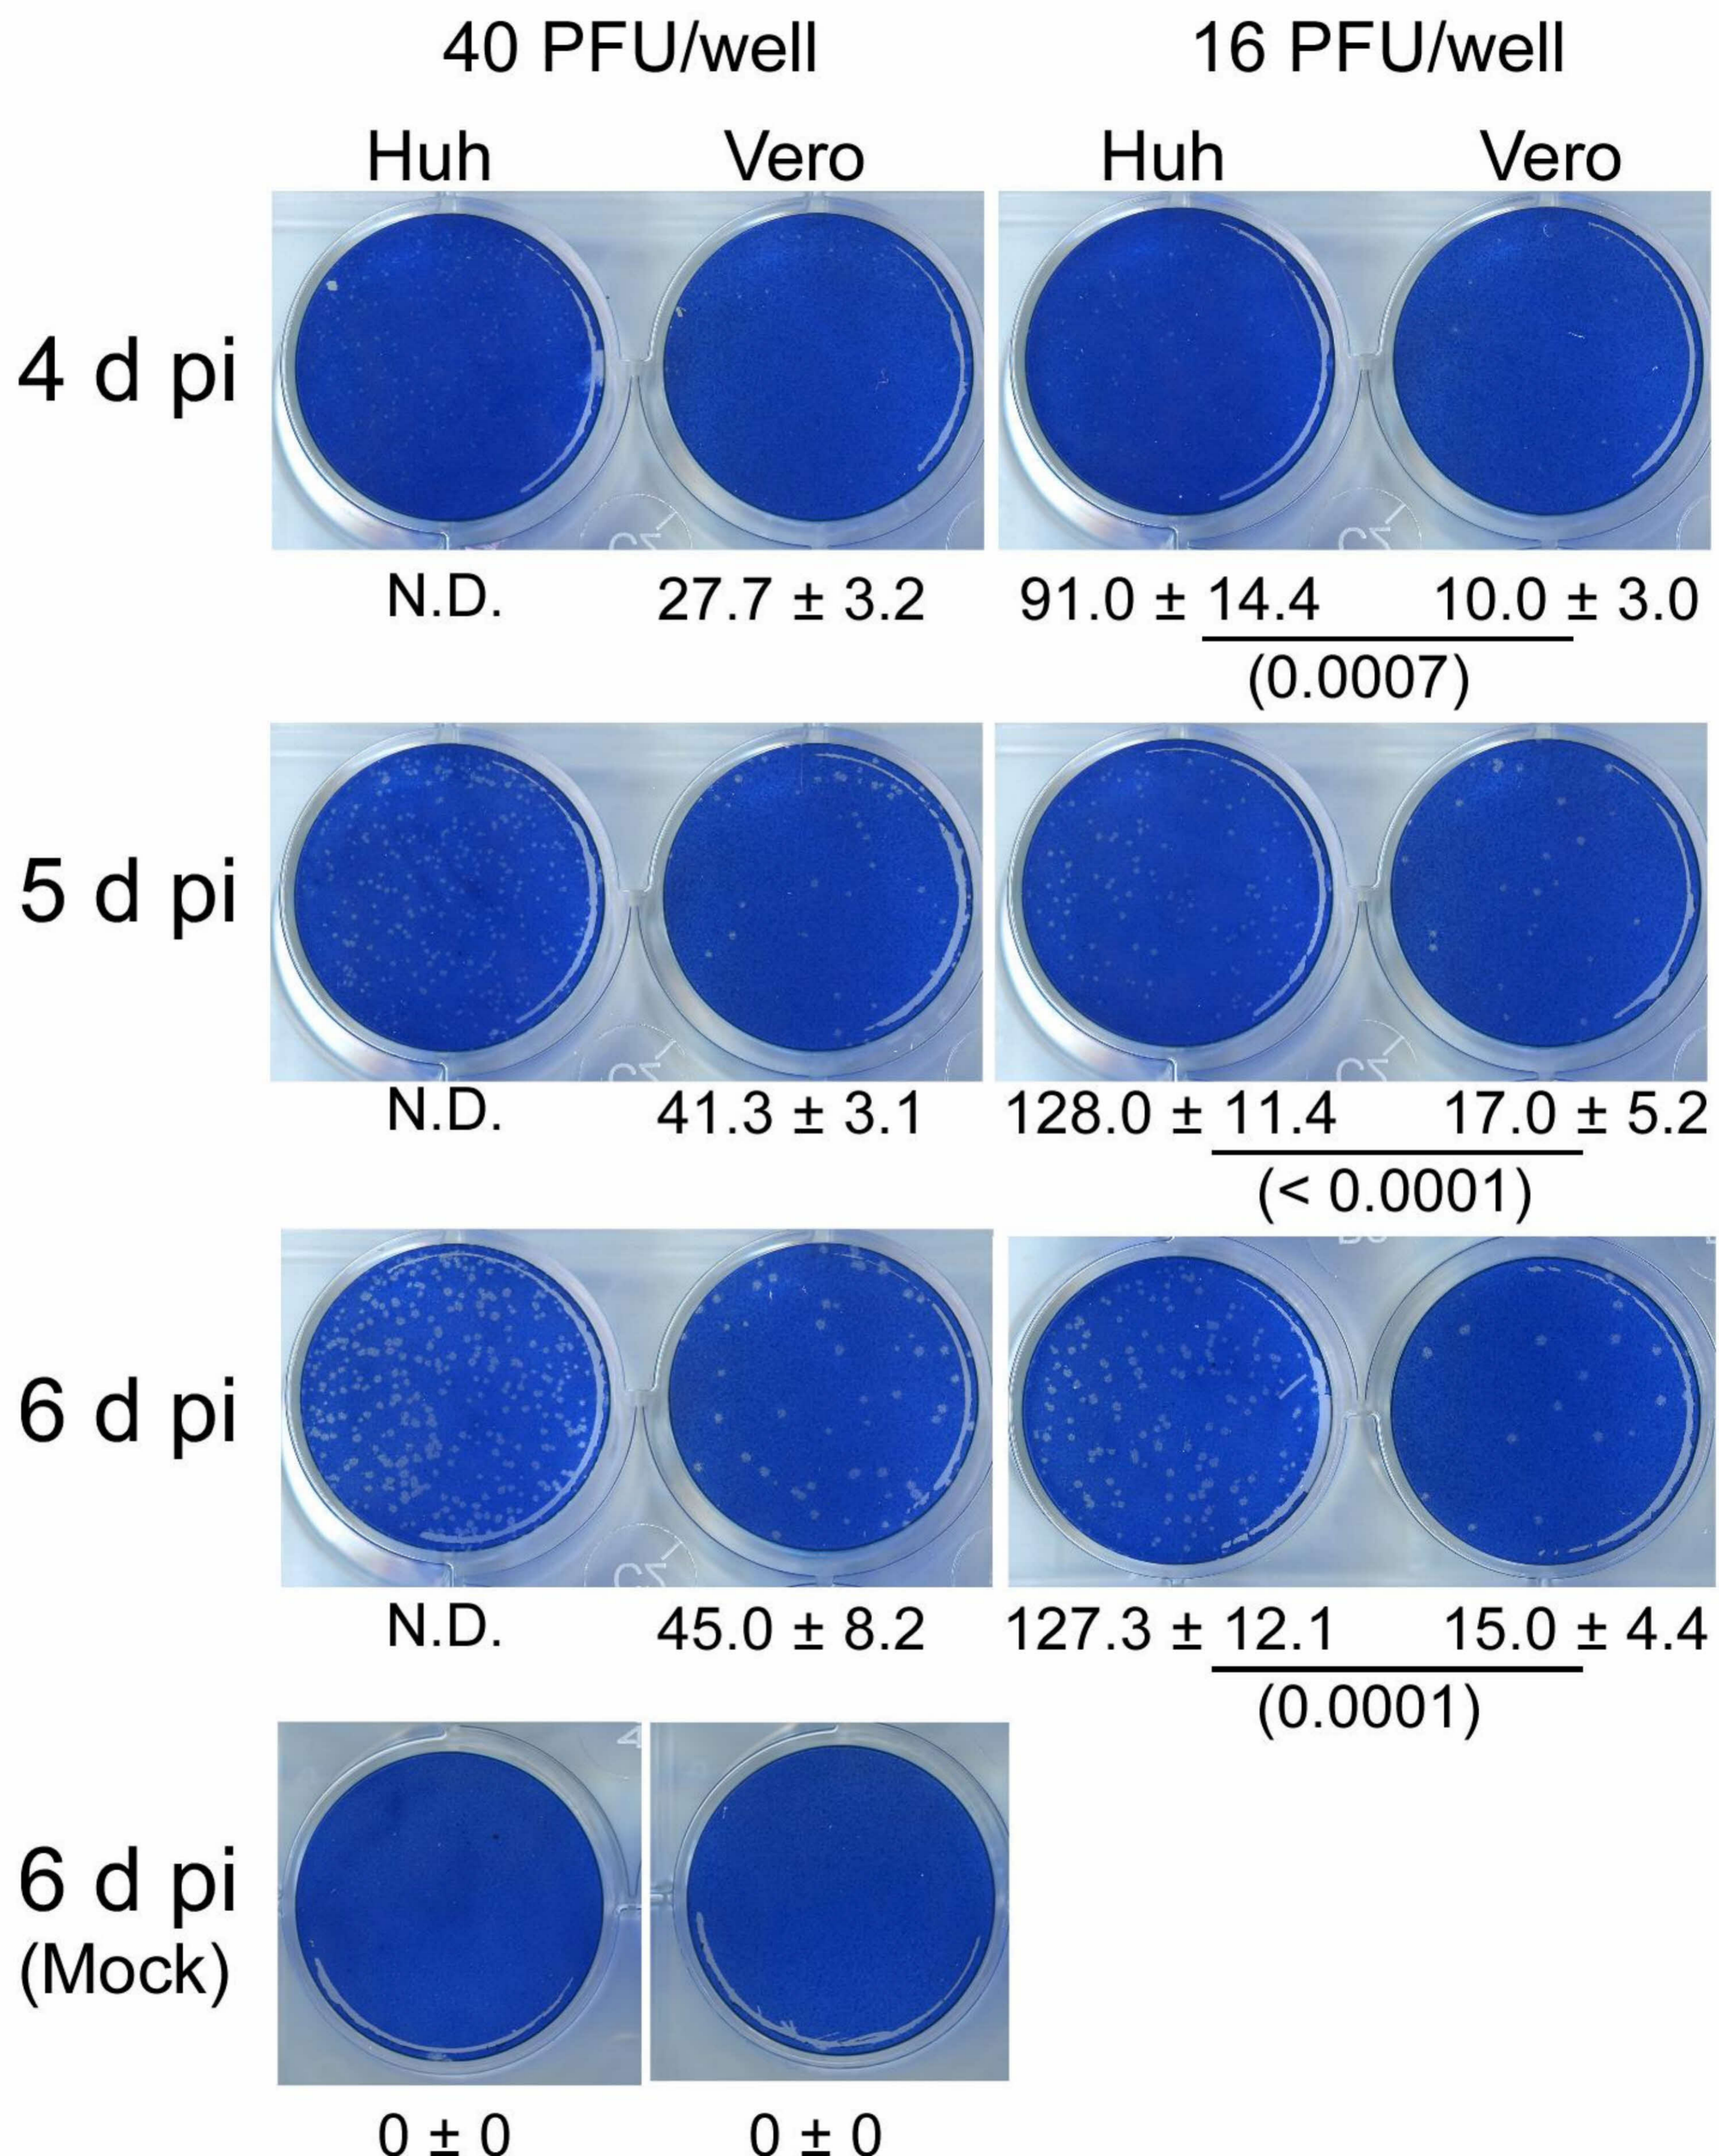

# S1B\_Fig\_unadjusted\_images

**B.**

DMEM  
overlay

EMEM  
overlay

3 d pi

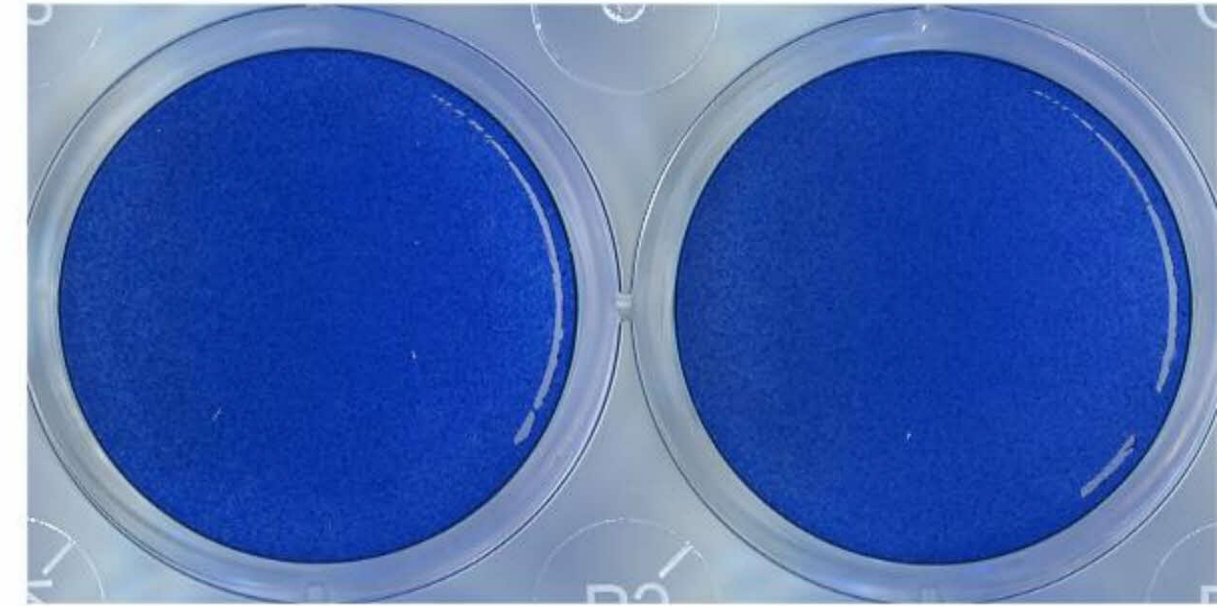

N.D.

N.D.

4 d pi

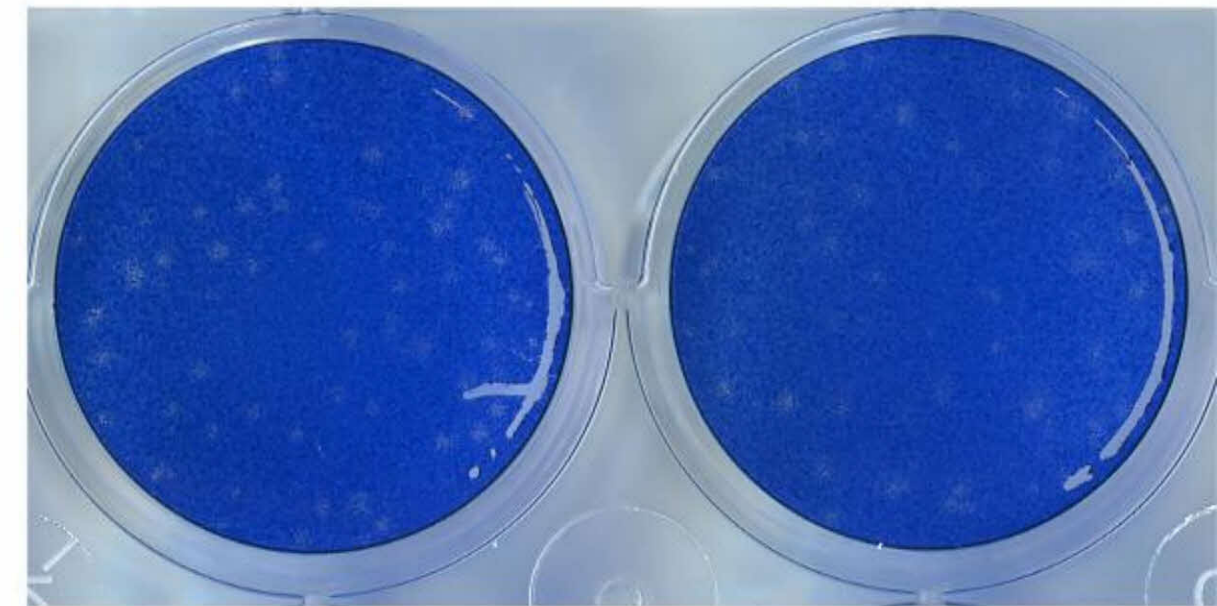

$51.3 \pm 9.0$

$49.3 \pm 1.5$

(0.72)

5 d pi

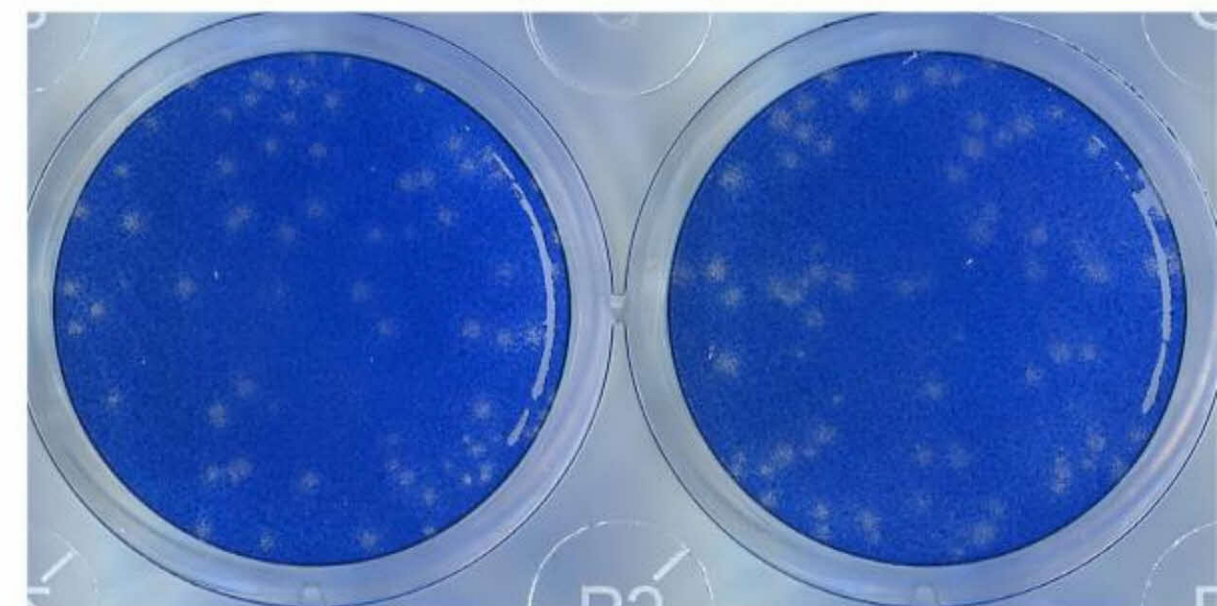

$59.0 \pm 9.5$

$65.0 \pm 5.2$

(0.39)

# S3\_Fig\_unadjusted\_images

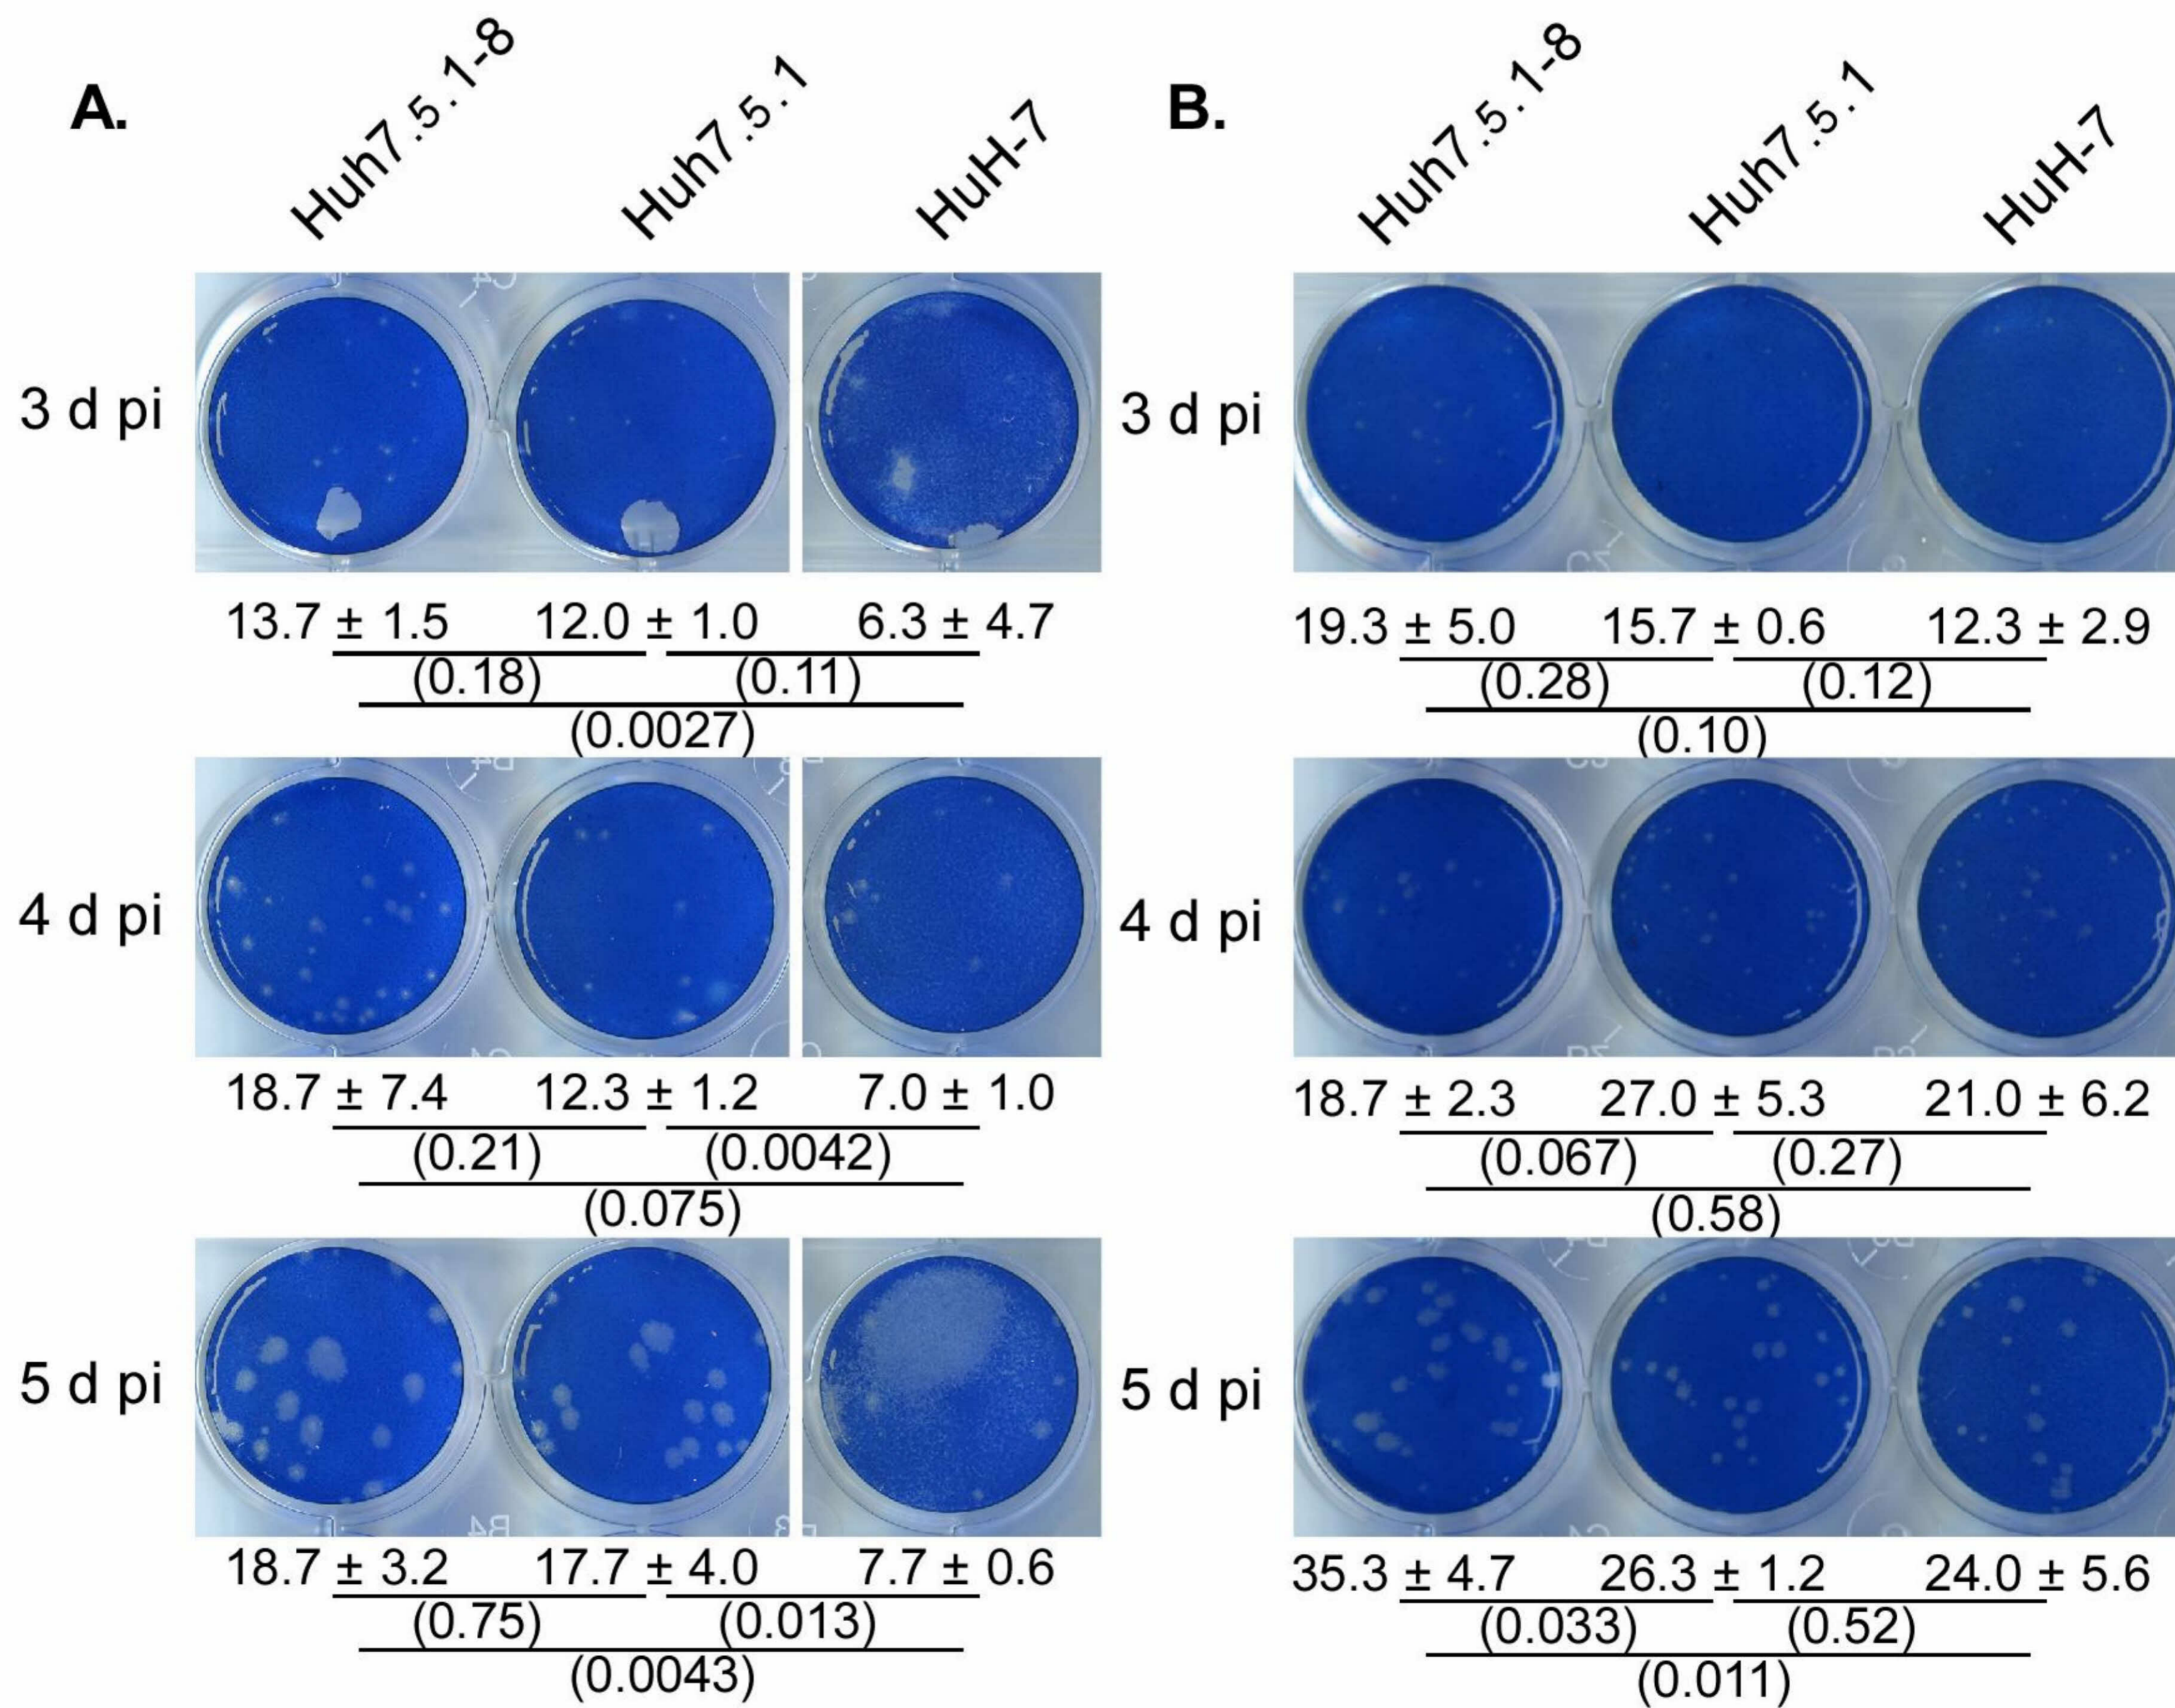

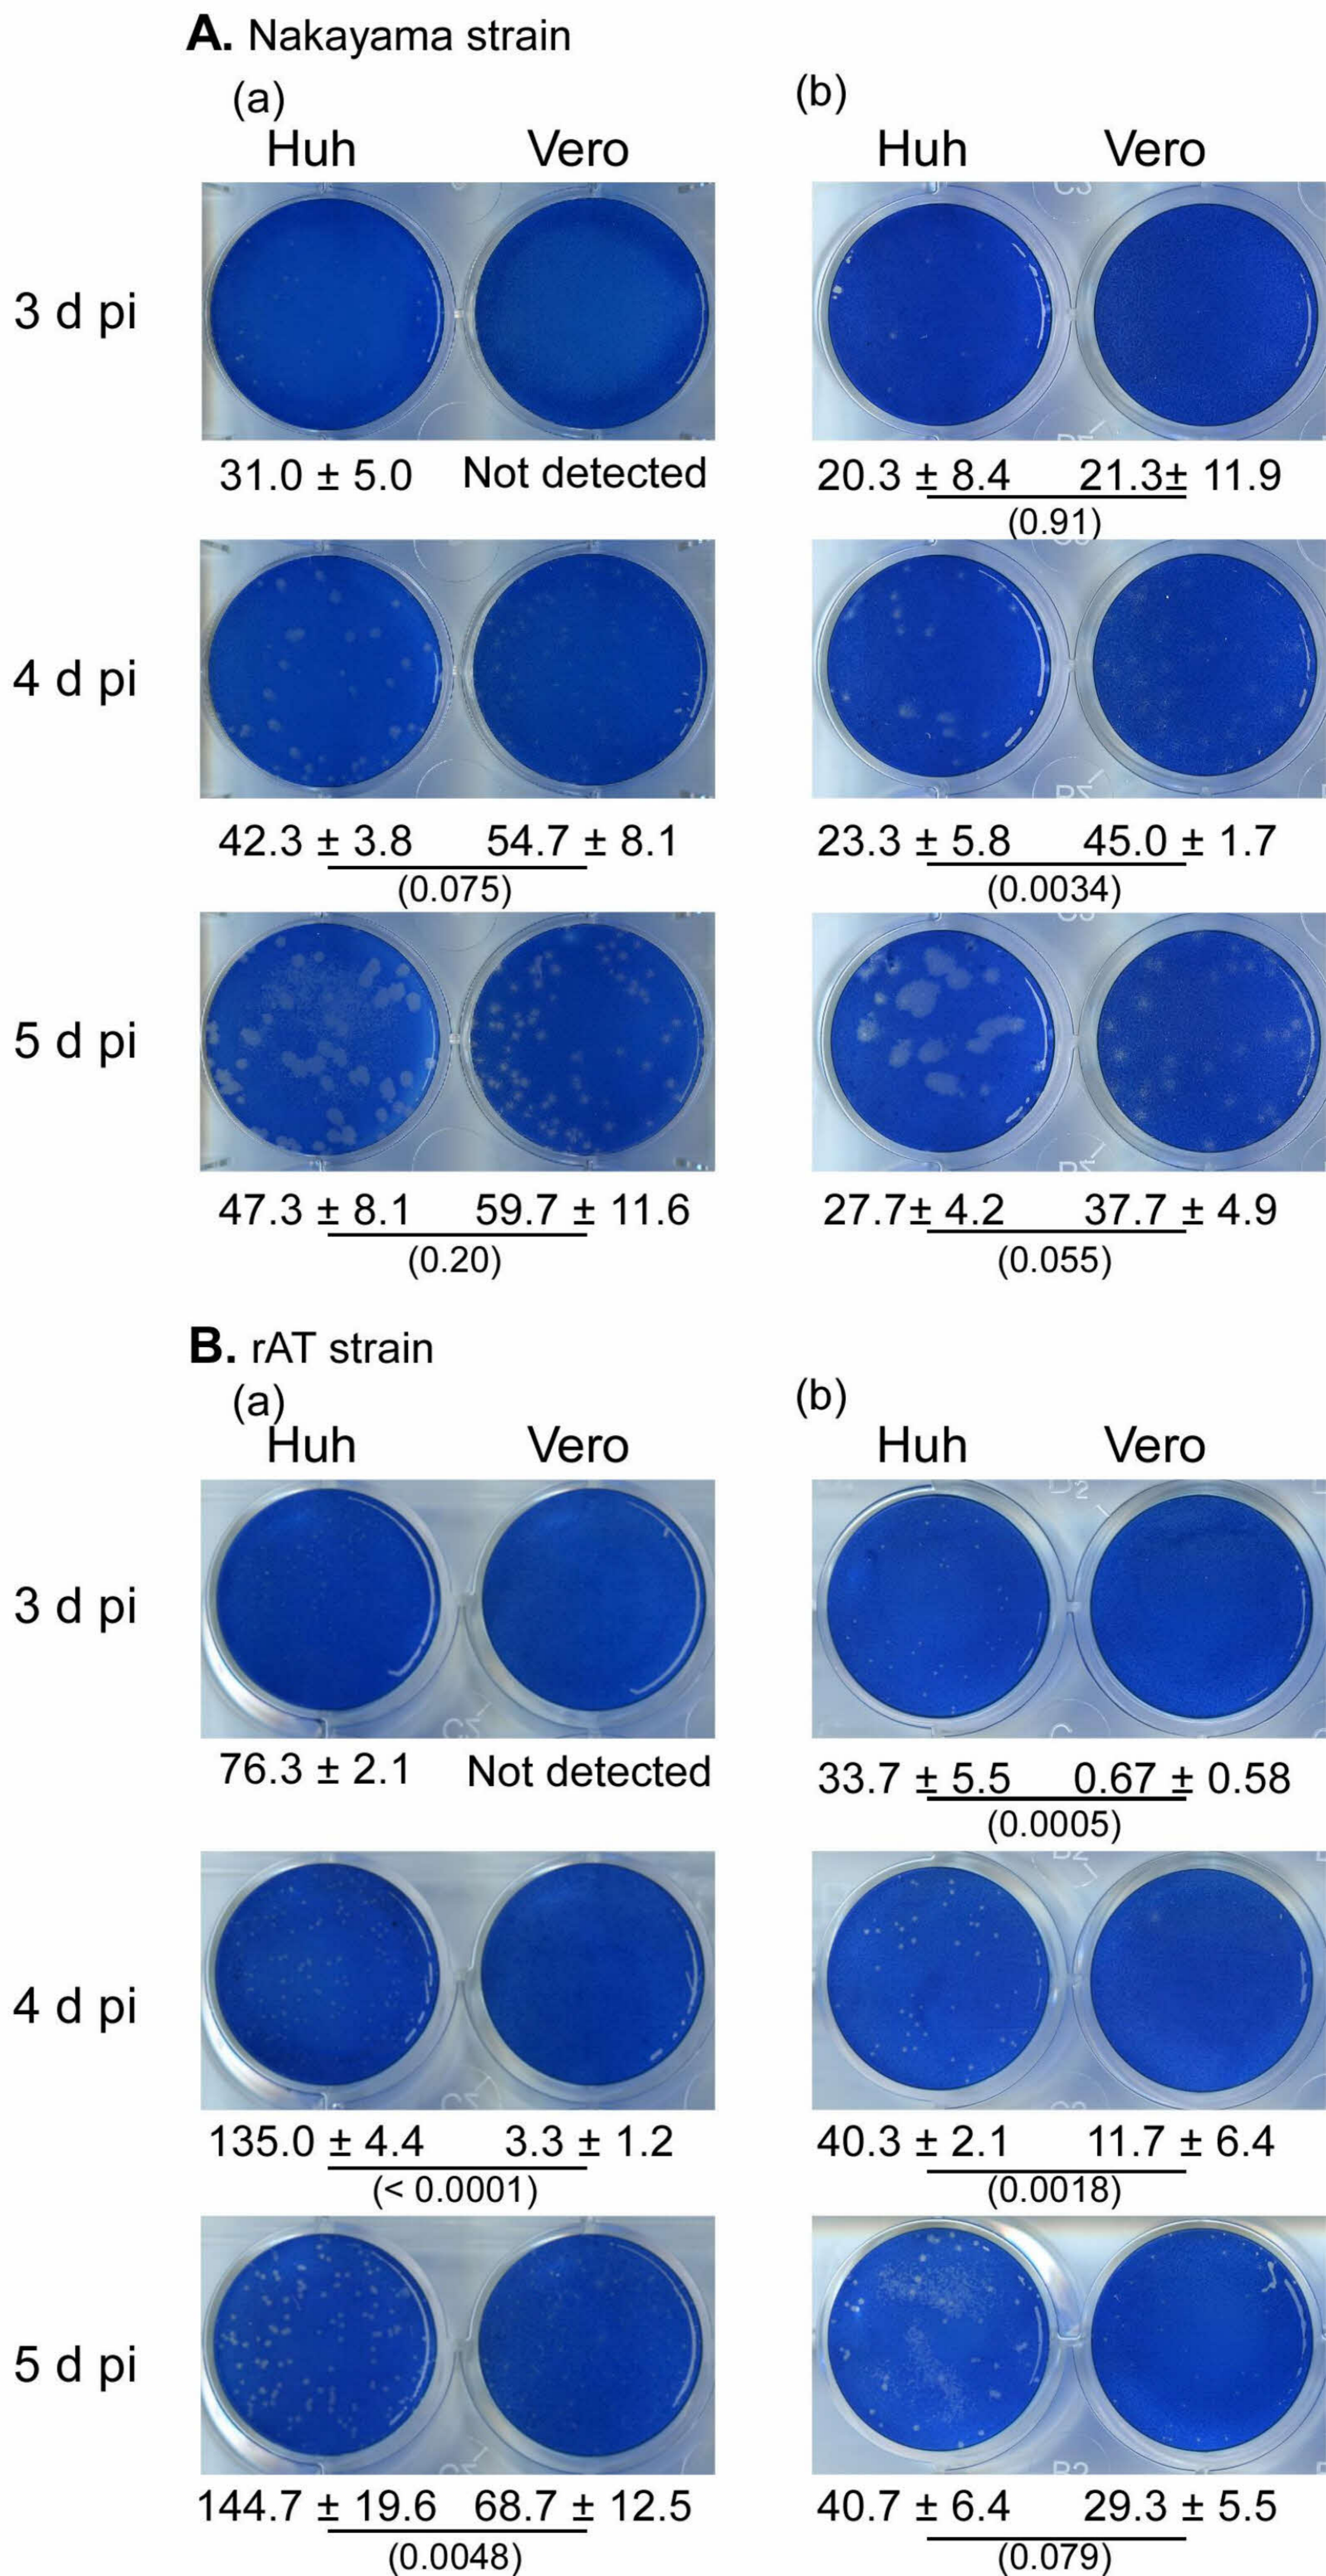

# S9\_Fig\_unadjusted\_images

**A.**

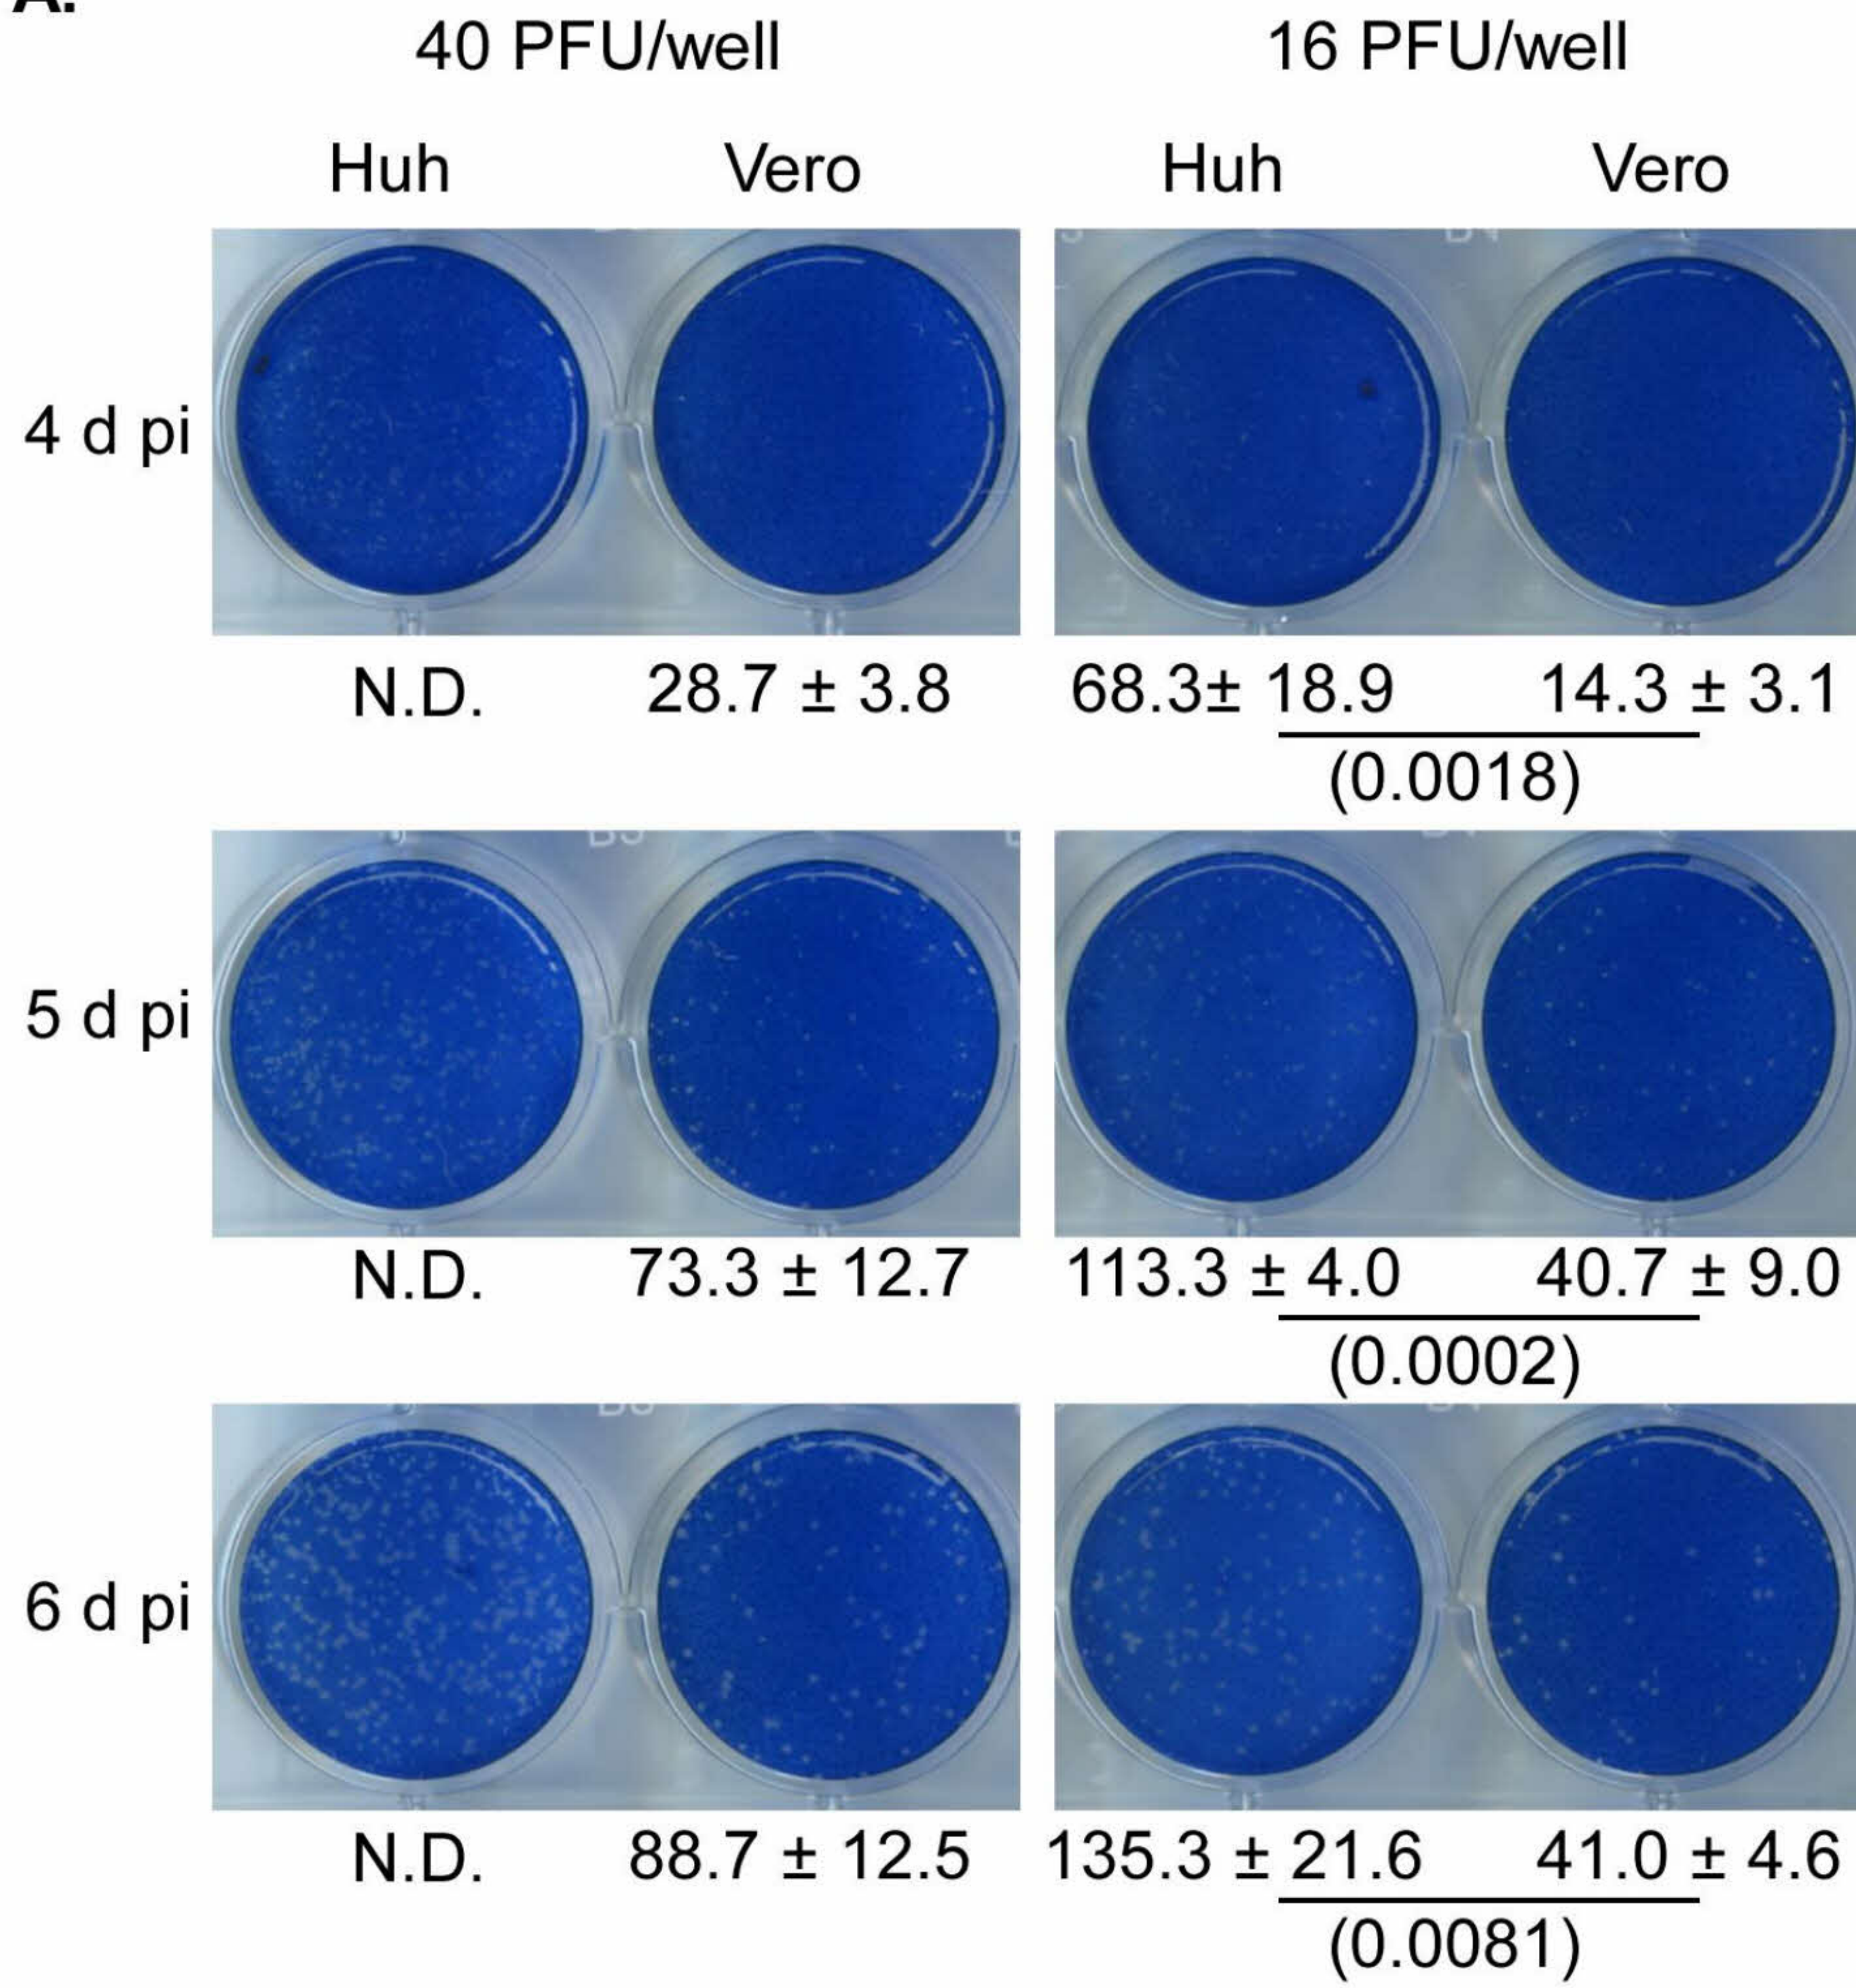

**B.**

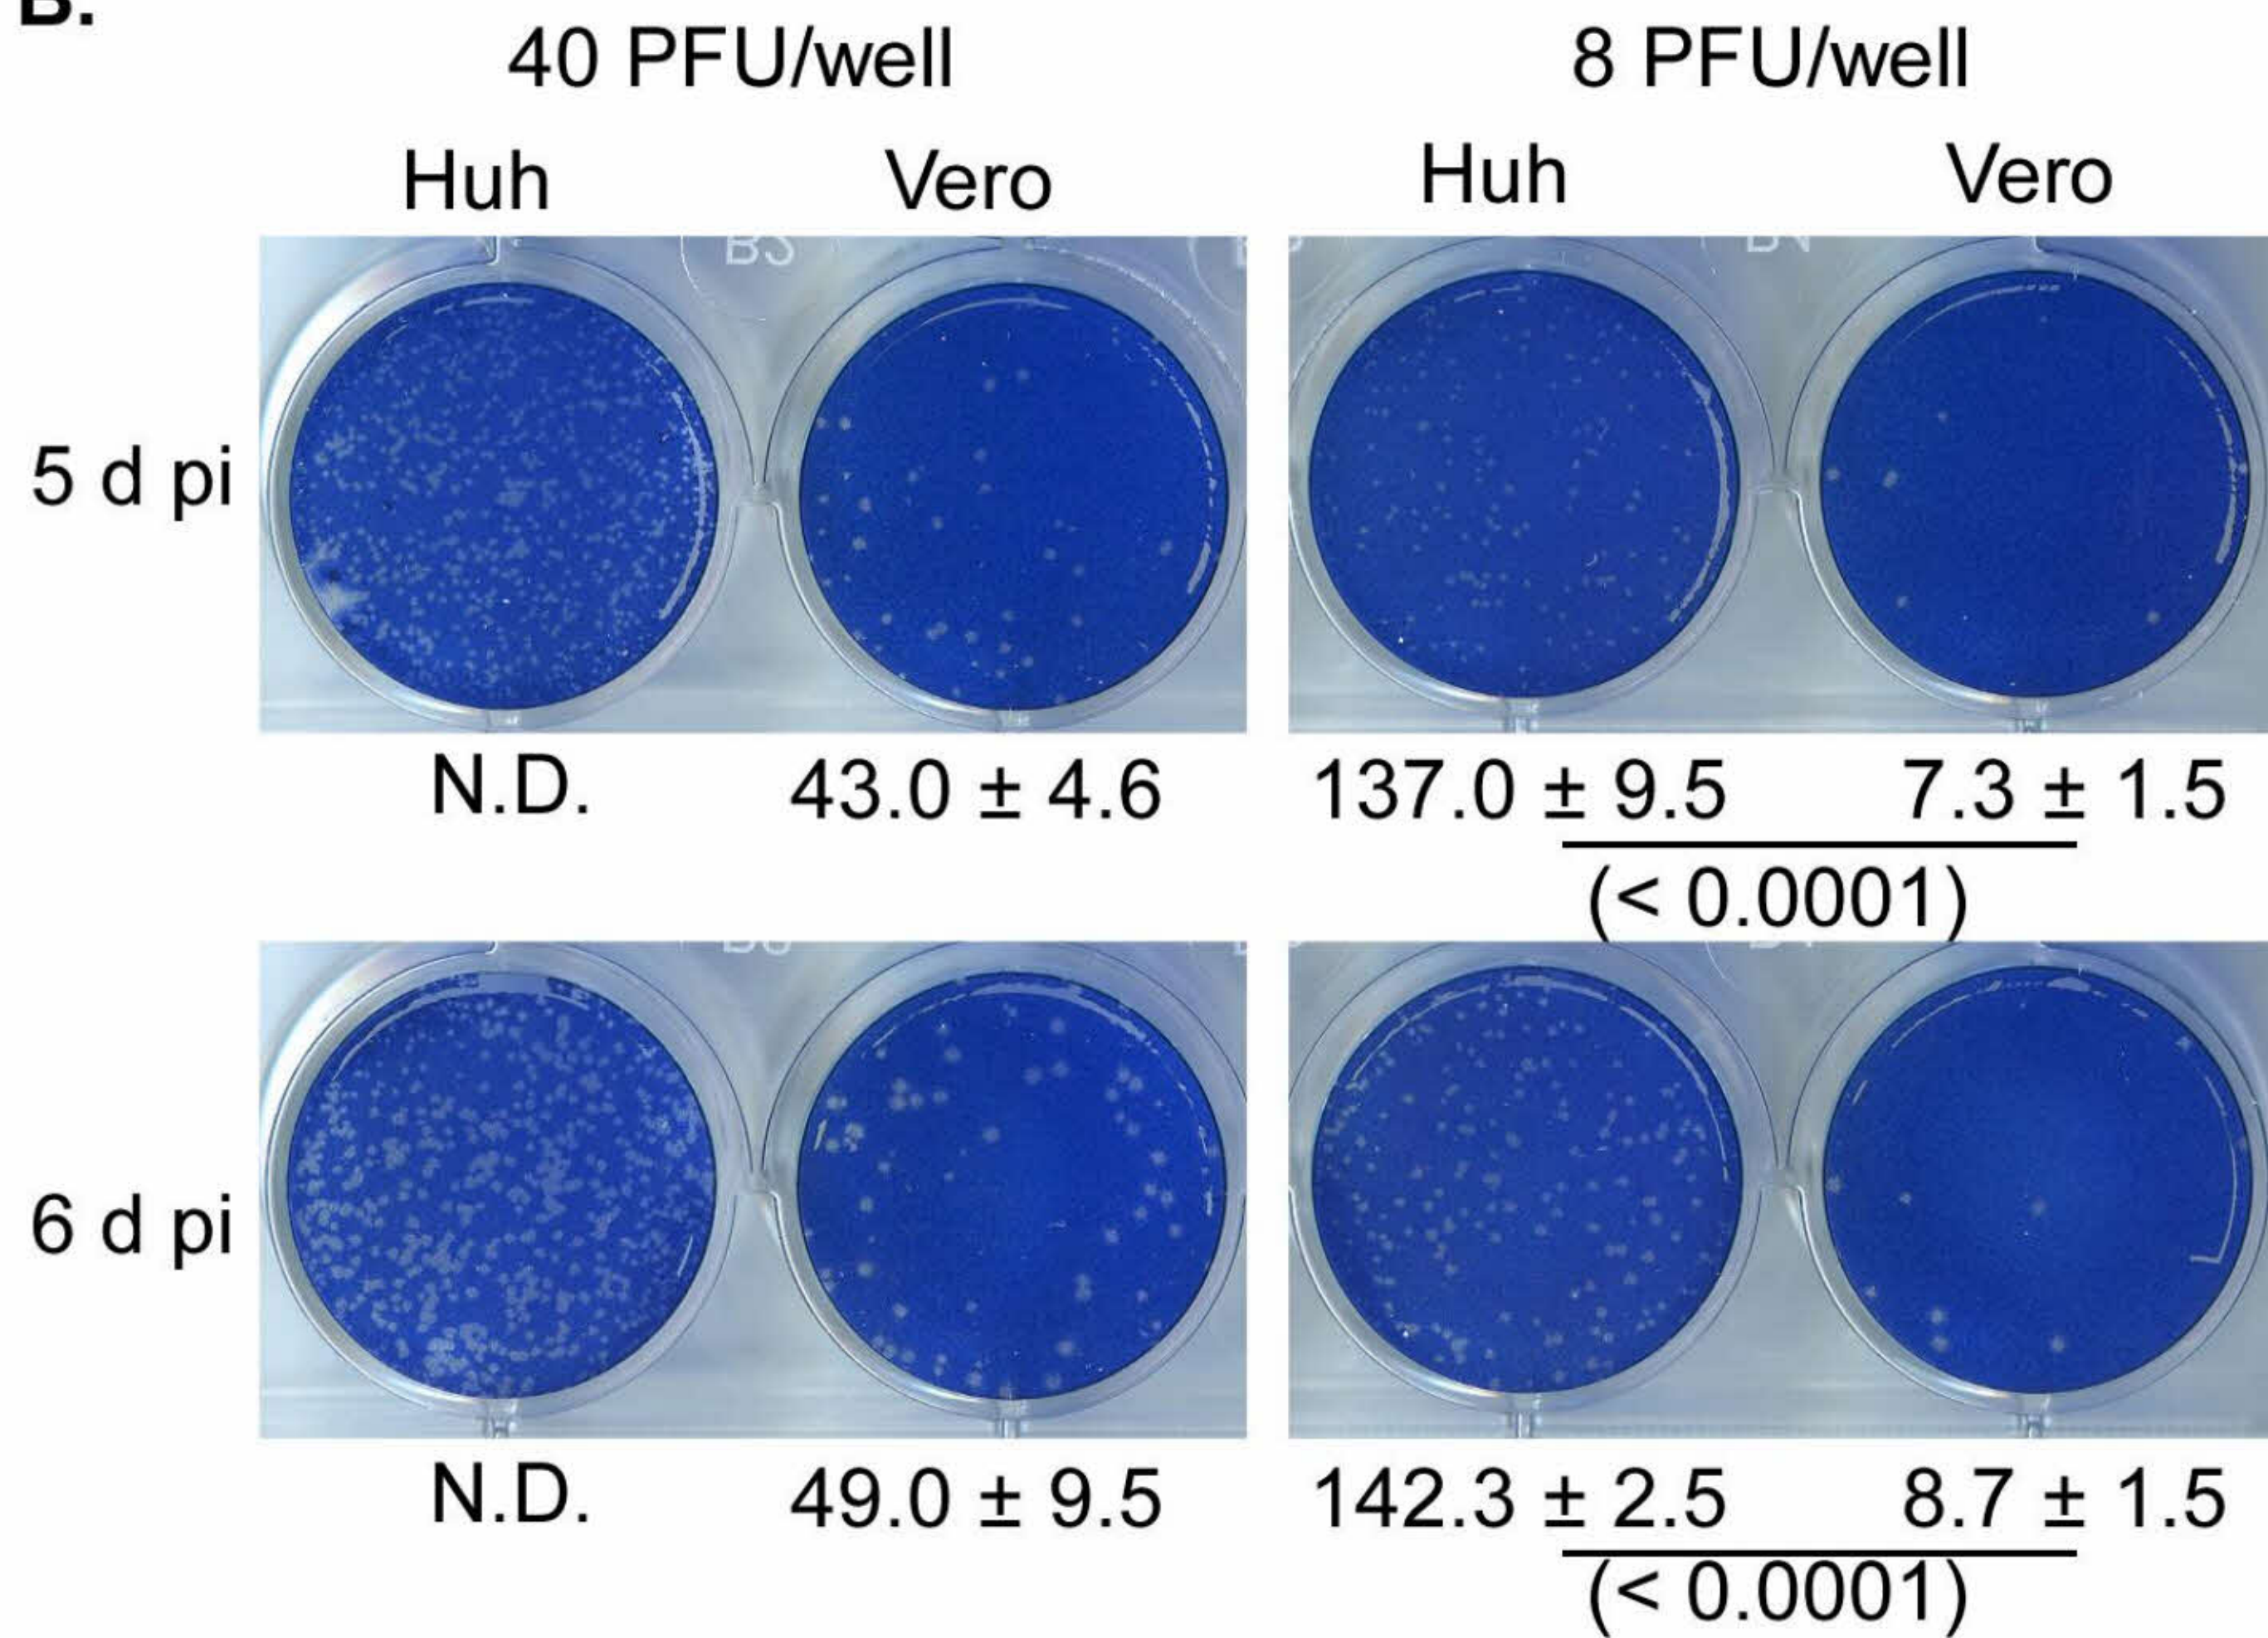

Supplement: pone.0232274.s011.pdf [file pone.0232274.s011.pdf]
