# Supplementary material for: Comparative characterization of flavivirus production in two cell lines: Human hepatoma-derived Huh7.5.1-8 and African green monkey kidney-derived Vero
Source: PubMed Central journal article supplement (PMC7182267; doi:10.1371/journal.pone.0232274), 2020-04-24

Fig 10\_raw\_image

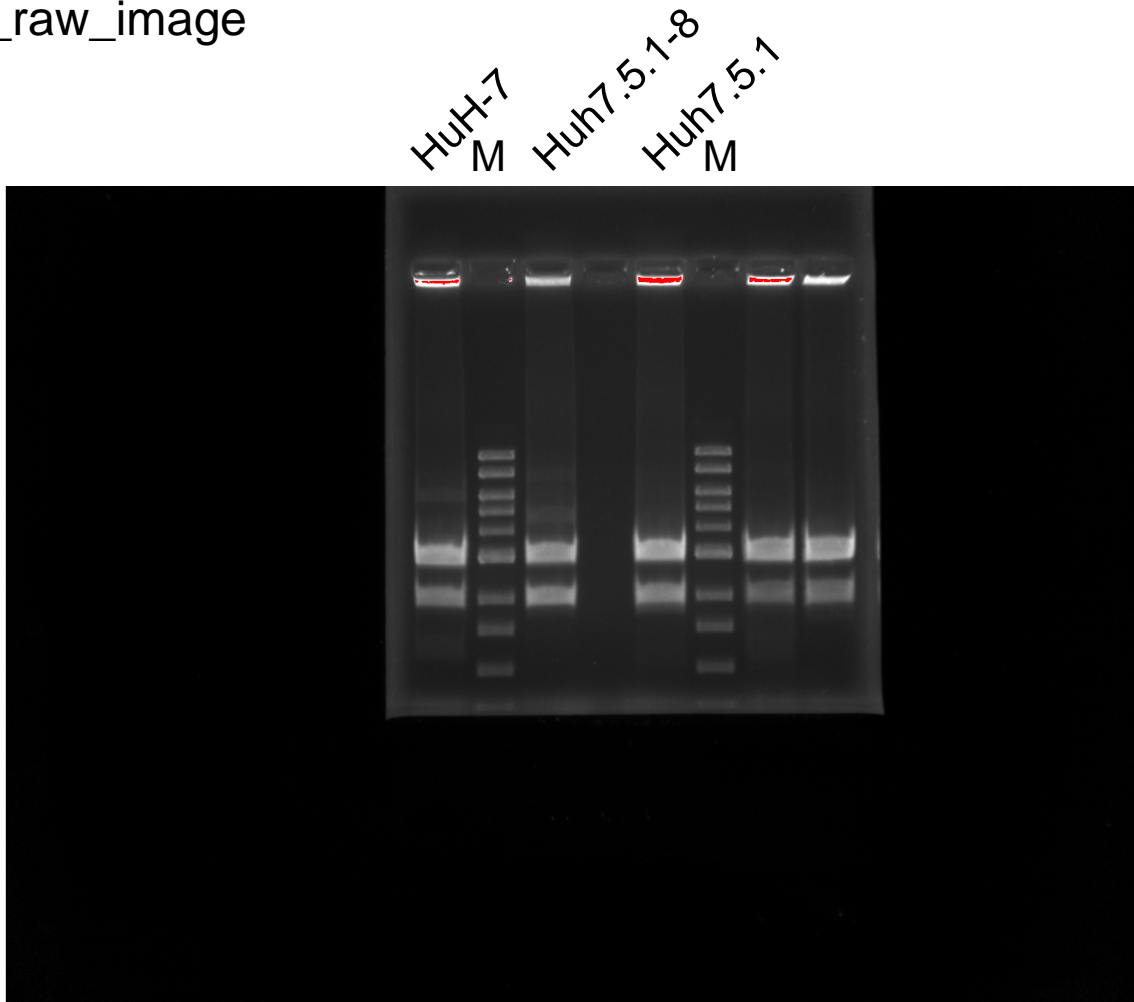

M: MW marker

10, 8, 6, 5, 4, 3, 2, 1.5,  
1, 0.5 (kbp)

(from top to bottom)

**Acquisition Information**

Imager: GelDoc™ EZ (Bio-rad)  
Exposure Time (sec): 0.173  
(Auto Intense Bands)  
Application: Ethidium Bromide  
Ref. Bkgd.Time (sec): 10

Flat Field: Applied  
Software version: 3.0  
Illumination Mode: UV Transillumination  
Image Area: X: 150.0 Y: 107.8  
Image Pixels: X: 1392 Y: 1000  
Pixel Size (um): X:107.8 Y: 107.8  
Data Range (Int): 0-4095

Fig 10\_cropped\_image

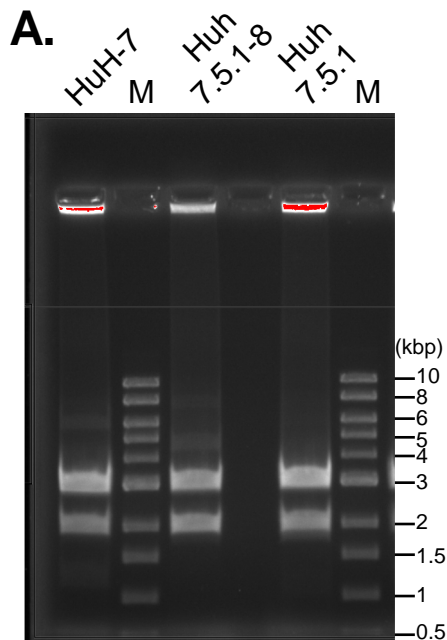

Supplement: pone.0232274.s012.pdf [file pone.0232274.s012.pdf]
